# Supplementary material for: Movements and dispersal of brown trout (Salmo trutta Linnaeus, 1758) in Mediterranean streams: influence of habitat and biotic factors
Source: PeerJ. 2018 Oct 12;6:e5730. doi: 10.7717/peerj.5730 (PMC6188007; doi:10.7717/peerj.5730)
Supplement: Supplemental Information 1 [file peerj-06-5730-s006.xlsx]

## Sheet: Fish
River	Sex	FL	Area1	Date1	Area2	Date2	Movement
Flamicell		185	S7	MAR93	F5	JUL93	-700
Flamicell		166	S9	MAR93	F9	JUL93	-1150
Flamicell		162	L2	MAR93	L2	JUL93	0
Flamicell		255	L2	MAR93	L3	JUL93	100
Flamicell		203	L3	MAR93	L3	JUL93	70
Flamicell		258	L3	MAR93	L3	JUL93	35
Flamicell		224	L3	MAR93	L3	JUL93	35
Flamicell		232	L3	MAR93	L3	JUL93	0
Flamicell		178	L3	MAR93	L3	JUL93	0
Flamicell		188	L3	MAR93	L3	JUL93	0
Flamicell		180	L3	MAR93	L3	JUL93	0
Flamicell		192	L3	MAR93	L3	JUL93	0
Flamicell		226	L3	MAR93	L3	JUL93	0
Flamicell		235	L3	MAR93	L3	JUL93	0
Flamicell		239	L3	MAR93	L3	JUL93	0
Flamicell		239	L3	MAR93	L3	JUL93	0
Flamicell		247	L3	MAR93	L3	JUL93	0
Flamicell	M	230	L3	MAR93	L3	JUL93	35
Flamicell		173	F5	MAR93	F5	JUL93	0
Flamicell		178	F5	MAR93	F5	JUL93	0
Flamicell	F	209	F5	MAR93	F5	JUL93	0
Flamicell		203	F5	MAR93	F5	JUL93	0
Flamicell		283	F5	MAR93	F5	JUL93	0
Flamicell	M	176	F5	MAR93	F5	JUL93	-33
Flamicell		171	CNC	MAR93	F9	JUL93	-520
Flamicell		204	F7	MAR93	F6	JUL93	34
Flamicell		145	F7	MAR93	F7	JUL93	0
Flamicell		199	F7	MAR93	F7	JUL93	-33
Flamicell		236	F7	MAR93	F6	JUL93	34
Flamicell		192	F7	MAR93	F7	JUL93	33
Flamicell		197	CNC	MAR93	CNC	JUL93	0
Flamicell		164	CNC	MAR93	F9	JUL93	-520
Flamicell		183	F4	MAR93	F4	JUL93	0
Flamicell		173	F7	MAR93	F6	JUL93	34
Flamicell		171	F7	MAR93	F7	JUL93	0
Flamicell		206	F6	MAR93	F6	JUL93	33
Flamicell		195	F6	MAR93	F6	JUL93	33
Flamicell		224	F6	MAR93	F6	JUL93	0
Flamicell	F	299	F6	MAR93	F6	JUL93	-33
Flamicell		202	F6	MAR93	F6	JUL93	0
Flamicell	F	238	F6	MAR93	F4	JUL93	134
Flamicell		156	F6	MAR93	F6	JUL93	0
Flamicell	F	189	F6	MAR93	F6	JUL93	33
Flamicell		163	F6	MAR93	F6	JUL93	0
Flamicell		225	F6	MAR93	F6	JUL93	-33
Flamicell	M	247	F6	MAR93	F6	JUL93	-33
Flamicell		192	F6	MAR93	F7	JUL93	-34
Flamicell		168	F6	MAR93	F6	JUL93	33
Flamicell		167	F9	MAR93	F9	JUL93	0
Flamicell		156	F9	MAR93	F9	JUL93	-33
Flamicell		162	F9	MAR93	F9	JUL93	-33
Flamicell		176	F9	MAR93	F9	JUL93	-33
Flamicell		222	F9	MAR93	F9	JUL93	-33
Flamicell		282	F9	MAR93	F9	JUL93	-33
Flamicell		197	F9	MAR93	F9	JUL93	-66
Flamicell		228	F9	MAR93	F9	JUL93	0
Flamicell		278	F9	MAR93	F9	JUL93	0
Flamicell		155	F8	MAR93	F8	JUL93	0
Flamicell		138	F8	MAR93	F8	JUL93	0
Flamicell		168	F8	MAR93	F8	JUL93	33
Flamicell		173	F8	MAR93	F8	JUL93	0
Flamicell		183	F8	MAR93	F8	JUL93	0
Flamicell		174	L3	JUL93	L3	OCT93	-35
Flamicell	F	233	L3	JUL93	L3	OCT93	-35
Flamicell		173	L3	JUL93	L3	OCT93	0
Flamicell		187	L3	JUL93	L2	OCT93	-100
Flamicell		170	L3	JUL93	L3	OCT93	-70
Flamicell		178	L3	JUL93	L3	OCT93	-35
Flamicell		172	L3	JUL93	L3	OCT93	0
Flamicell		172	L3	JUL93	L3	OCT93	-35
Flamicell		175	L3	JUL93	L3	OCT93	0
Flamicell		203	L3	JUL93	L3	OCT93	0
Flamicell	F	216	L3	JUL93	L3	OCT93	0
Flamicell	M	227	L3	JUL93	L3	OCT93	0
Flamicell		193	L3	JUL93	L3	OCT93	0
Flamicell		162	L3	JUL93	L3	OCT93	0
Flamicell		175	L3	JUL93	L3	OCT93	0
Flamicell		184	L3	JUL93	L3	OCT93	0
Flamicell	M	182	L3	JUL93	L3	OCT93	0
Flamicell		205	L3	JUL93	L3	OCT93	0
Flamicell		223	L3	JUL93	L2	OCT93	-160
Flamicell	M	242	L3	JUL93	L3	OCT93	-70
Flamicell		222	L3	JUL93	L3	OCT93	-35
Flamicell		269	L3	JUL93	L3	OCT93	0
Flamicell		305	L3	JUL93	L3	OCT93	-35
Flamicell	M	174	F8	JUL93	F7	OCT93	34
Flamicell		180	F8	JUL93	F7	OCT93	34
Flamicell		177	F7	JUL93	F7	OCT93	0
Flamicell		192	F7	JUL93	F6	OCT93	67
Flamicell		187	F7	JUL93	F6	OCT93	67
Flamicell		205	F7	JUL93	F7	OCT93	33
Flamicell	M	202	F7	JUL93	F5	OCT93	233
Flamicell		168	F7	JUL93	F6	OCT93	67
Flamicell		194	F7	JUL93	F7	OCT93	-33
Flamicell		193	F7	JUL93	F6	OCT93	34
Flamicell		203	F7	JUL93	F7	OCT93	0
Flamicell		212	F7	JUL93	F7	OCT93	-33
Flamicell	M	204	F7	JUL93	F7	OCT93	-33
Flamicell		182	F7	JUL93	F6	OCT93	34
Flamicell		198	F5	JUL93	F5	OCT93	33
Flamicell	F	223	F5	JUL93	F4	OCT93	100
Flamicell	M	177	F5	JUL93	F5	OCT93	-33
Flamicell		213	CNC	JUL93	F6	OCT93	-68
Flamicell	M	197	CNC	JUL93	CNC	OCT93	-119
Flamicell		177	F4	JUL93	F5	OCT93	-34
Flamicell		188	F4	JUL93	F5	OCT93	-100
Flamicell		175	F4	JUL93	F5	OCT93	-107
Flamicell		206	F3	JUL93	CNC	OCT93	-160
Flamicell		182	L1	JUL93	L1	OCT93	0
Flamicell		203	F6	JUL93	F6	OCT93	33
Flamicell	M	207	F6	JUL93	F6	OCT93	0
Flamicell		161	F6	JUL93	F6	OCT93	0
Flamicell	M	160	F6	JUL93	F6	OCT93	0
Flamicell		178	F6	JUL93	F6	OCT93	0
Flamicell		173	F6	JUL93	F6	OCT93	33
Flamicell	M	192	F6	JUL93	F6	OCT93	0
Flamicell		197	F6	JUL93	F6	OCT93	33
Flamicell		273	F6	JUL93	F6	OCT93	0
Flamicell	M	327	F6	JUL93	F6	OCT93	33
Flamicell	M	153	F6	JUL93	F6	OCT93	33
Flamicell		215	F6	JUL93	F6	OCT93	33
Flamicell	M	203	F6	JUL93	F6	OCT93	0
Flamicell		186	F6	JUL93	S9	OCT93	817
Flamicell		203	F6	JUL93	F6	OCT93	0
Flamicell		213	F6	JUL93	F6	OCT93	33
Flamicell		228	F6	JUL93	F6	OCT93	33
Flamicell		161	F6	JUL93	F6	OCT93	0
Flamicell		162	F6	JUL93	F6	OCT93	0
Flamicell	M	168	F6	JUL93	F6	OCT93	0
Flamicell	M	170	F6	JUL93	F6	OCT93	0
Flamicell		202	F6	JUL93	F6	OCT93	0
Flamicell	M	198	F6	JUL93	F6	OCT93	0
Flamicell		182	F6	JUL93	F8	OCT93	-200
Flamicell		178	F6	JUL93	F6	OCT93	0
Flamicell		167	F6	JUL93	F6	OCT93	0
Flamicell	M	178	F6	JUL93	F6	OCT93	0
Flamicell		182	F6	JUL93	F6	OCT93	0
Flamicell		212	F6	JUL93	F6	OCT93	0
Flamicell	F	206	F6	JUL93	F6	OCT93	0
Flamicell		192	F6	JUL93	F6	OCT93	0
Flamicell		177	L2	JUL93	L2	OCT93	30
Flamicell		186	L2	JUL93	L2	OCT93	0
Flamicell		180	L3	JUL93	L3	OCT93	0
Flamicell		185	L2	JUL93	L2	OCT93	0
Flamicell		263	L3	JUL93	L2	OCT93	-100
Flamicell		186	L3	JUL93	L3	OCT93	0
Flamicell		242	L3	JUL93	L3	OCT93	0
Flamicell		256	L3	JUL93	L3	OCT93	0
Flamicell	M	242	L3	JUL93	L3	OCT93	-35
Flamicell		192	F5	JUL93	F6	OCT93	-34
Flamicell	F	223	F5	JUL93	F4	OCT93	100
Flamicell		228	F5	JUL93	F6	OCT93	-67
Flamicell	M	186	F5	JUL93	F5	OCT93	33
Flamicell		233	F6	JUL93	F6	OCT93	33
Flamicell	F	322	F6	JUL93	F6	OCT93	33
Flamicell	F	252	F4	JUL93	F3	OCT93	145
Flamicell	F	197	F6	JUL93	F6	OCT93	0
Flamicell		203	F6	JUL93	F6	OCT93	0
Flamicell	M	277	F6	JUL93	F6	OCT93	33
Flamicell		202	F8	JUL93	F8	OCT93	0
Flamicell		153	F8	JUL93	F9	OCT93	-100
Flamicell		225	F9	OCT93	F9	JUN94	-33
Flamicell		172	F7	OCT93	F7	JUN94	0
Flamicell		262	F7	OCT93	F7	JUN94	0
Flamicell	M	235	F7	OCT93	F7	JUN94	0
Flamicell		247	F7	OCT93	F7	JUN94	0
Flamicell		203	F7	OCT93	F7	JUN94	0
Flamicell		207	F7	OCT93	F7	JUN94	0
Flamicell		222	F7	OCT93	F7	JUN94	0
Flamicell		210	F7	OCT93	F6	JUN94	67
Flamicell		197	F7	OCT93	F7	JUN94	0
Flamicell		202	F7	OCT93	F7	JUN94	-33
Flamicell	M	200	F7	OCT93	F6	JUN94	67
Flamicell		188	F7	OCT93	F6	JUN94	34
Flamicell		221	F7	OCT93	F7	JUN94	0
Flamicell		247	F7	OCT93	F7	JUN94	33
Flamicell		204	F7	OCT93	F7	JUN94	33
Flamicell	M	243	F5	OCT93	CNC	JUN94	60
Flamicell		231	F5	OCT93	F7	JUN94	-200
Flamicell		214	F5	OCT93	F9	JUN94	-433
Flamicell	M	257	F5	OCT93	CNC	JUN94	87
Flamicell		206	F5	OCT93	F5	JUN94	-66
Flamicell		238	F5	OCT93	F5	JUN94	-33
Flamicell		181	CNC	OCT93	CNC	JUN94	60
Flamicell		177	CNC	OCT93	CNC	JUN94	0
Flamicell	F	299	F4	OCT93	F6	JUN94	-174
Flamicell		199	F4	OCT93	F6	JUN94	-280
Flamicell		201	L3	OCT93	L3	JUN94	35
Flamicell	F	238	L3	OCT93	L3	JUN94	0
Flamicell		203	L3	OCT93	L3	JUN94	35
Flamicell		199	L3	OCT93	L3	JUN94	0
Flamicell		181	L3	OCT93	L3	JUN94	0
Flamicell		207	L3	OCT93	L3	JUN94	-35
Flamicell		264	L2	OCT93	L2	JUN94	0
Flamicell	M	257	L3	OCT93	L2	JUN94	-60
Flamicell		241	L3	OCT93	L3	JUN94	35
Flamicell		306	L3	OCT93	L3	JUN94	35
Flamicell		211	F6	OCT93	F6	JUN94	0
Flamicell		204	F6	OCT93	F6	JUN94	33
Flamicell		248	F7	OCT93	F6	JUN94	67
Flamicell		221	F6	OCT93	F6	JUN94	66
Flamicell	M	205	F5	OCT93	CNC	JUN94	120
Flamicell		202	F5	OCT93	F6	JUN94	-100
Flamicell		230	F6	OCT93	F6	JUN94	0
Flamicell		243	F6	OCT93	F6	JUN94	0
Flamicell		226	F6	OCT93	F6	JUN94	0
Flamicell	M	140	F6	OCT93	F6	JUN94	0
Flamicell		219	L3	OCT93	L3	JUN94	0
Flamicell		274	L2	OCT93	L2	JUN94	0
Flamicell	M	257	L2	OCT93	L2	JUN94	-60
Flamicell		223	L3	OCT93	L3	JUN94	35
Flamicell		250	F6	OCT93	F6	JUN94	0
Flamicell		212	F6	OCT93	F6	JUN94	0
Flamicell		182	F6	OCT93	F6	JUN94	0
Flamicell	M	222	F6	OCT93	F6	JUN94	0
Flamicell	M	201	F6	OCT93	F6	JUN94	0
Flamicell	M	242	F6	OCT93	F3	JUN94	254
Flamicell	F	267	F6	OCT93	F6	JUN94	0
Flamicell		172	F6	OCT93	F6	JUN94	0
Flamicell		190	F6	OCT93	F6	JUN94	0
Flamicell		218	F6	OCT93	F6	JUN94	0
Flamicell		207	F6	OCT93	F6	JUN94	0
Flamicell		184	F6	OCT93	F6	JUN94	0
Flamicell	M	217	F6	OCT93	F7	JUN94	-133
Flamicell		207	F6	OCT93	F6	JUN94	0
Flamicell		259	F6	OCT93	CNC	JUN94	35
Flamicell		235	F6	OCT93	F6	JUN94	0
Flamicell	M	255	F6	OCT93	F6	JUN94	0
Flamicell	F	263	F6	OCT93	F6	JUN94	0
Flamicell		255	L1	OCT93	F6	JUN94	-997
Flamicell		221	F6	OCT93	F6	JUN94	0
Flamicell	M	247	S10	OCT93	F8	JUN94	-1075
Flamicell		277	F5	OCT93	F3	JUN94	220
Flamicell		223	F4	OCT93	CNC	JUN94	-60
Flamicell	M	242	F4	OCT93	F3	JUN94	40
Flamicell		228	F3	OCT93	F3	JUN94	0
Flamicell		232	F3	OCT93	F6	JUN94	-254
Flamicell	F	290	F3	OCT93	F6	JUN94	-254
Flamicell		202	L1	OCT93	F9	JUN94	-1250
Flamicell		253	L1	OCT93	L3	JUN94	195
Flamicell		267	L1	OCT93	L1	JUN94	40
Flamicell	M	214	L1	OCT93	L1	JUN94	40
Flamicell		160	L1	OCT93	F3	JUN94	-710
Flamicell		227	S1	OCT93	F7	JUN94	-684
Flamicell		200	L1	OCT93	L1	JUN94	0
Flamicell		180	L2	OCT93	L2	JUN94	30
Flamicell		201	L2	OCT93	L3	JUN94	130
Flamicell	F	278	L2	OCT93	L3	JUN94	130
Flamicell		164	L2	OCT93	L2	JUN94	0
Flamicell		182	L2	OCT93	L3	JUN94	30
Flamicell		175	L2	OCT93	L2	JUN94	-30
Flamicell		187	L2	OCT93	L2	JUN94	0
Flamicell	M	199	L2	OCT93	L2	JUN94	0
Flamicell		228	L2	OCT93	L2	JUN94	0
Flamicell		232	L2	OCT93	L2	JUN94	0
Flamicell		220	L2	OCT93	L2	JUN94	0
Flamicell		227	L2	OCT93	L3	JUN94	30
Flamicell		205	L3	OCT93	L3	JUN94	70
Flamicell		212	L3	OCT93	L1	JUN94	-120
Flamicell		197	L3	OCT93	L1	JUN94	-120
Flamicell		213	L3	OCT93	L3	JUN94	0
Flamicell		212	L3	OCT93	L3	JUN94	0
Flamicell		226	L3	OCT93	L3	JUN94	0
Flamicell		222	L3	OCT93	L2	JUN94	-30
Flamicell		211	L3	OCT93	L3	JUN94	0
Flamicell		225	L3	OCT93	L3	JUN94	0
Flamicell	M	286	L3	OCT93	L3	JUN94	70
Flamicell		168	L3	OCT93	L3	JUN94	0
Flamicell		183	L3	OCT93	L3	JUN94	-35
Flamicell	F	197	L3	OCT93	L3	JUN94	35
Flamicell		201	L3	OCT93	L3	JUN94	0
Flamicell		168	L3	OCT93	L3	JUN94	0
Flamicell		152	L3	OCT93	L3	JUN94	35
Flamicell		232	L3	OCT93	L2	JUN94	-65
Flamicell		220	L3	OCT93	L3	JUN94	35
Flamicell		225	L3	OCT93	L3	JUN94	35
Flamicell		218	L3	OCT93	L3	JUN94	35
Flamicell		227	L3	OCT93	L3	JUN94	0
Flamicell		183	L3	OCT93	L3	JUN94	35
Flamicell		182	L3	OCT93	L3	JUN94	35
Flamicell		223	L3	OCT93	L3	JUN94	35
Flamicell		172	L3	OCT93	L3	JUN94	0
Flamicell		191	L3	OCT93	L3	JUN94	-35
Flamicell		217	L3	OCT93	L3	JUN94	0
Flamicell	F	232	L3	OCT93	L3	JUN94	0
Flamicell		228	L3	OCT93	L3	JUN94	0
Flamicell		193	L3	OCT93	L3	JUN94	-35
Flamicell		160	L3	OCT93	L3	JUN94	-35
Flamicell		177	L3	OCT93	L3	JUN94	0
Flamicell	M	281	L3	OCT93	L2	JUN94	-130
Flamicell		192	F6	OCT93	F6	JUN94	33
Flamicell		207	F6	OCT93	F6	JUN94	33
Flamicell		193	F6	OCT93	F6	JUN94	66
Flamicell	M	240	F6	OCT93	F6	JUN94	0
Flamicell		215	F6	OCT93	F6	JUN94	0
Flamicell		220	F6	OCT93	F6	JUN94	0
Flamicell		218	F6	OCT93	F6	JUN94	33
Flamicell		209	F6	OCT93	F6	JUN94	0
Flamicell		152	F6	OCT93	F6	JUN94	0
Flamicell		203	F6	OCT93	F6	JUN94	33
Flamicell		202	F6	OCT93	F6	JUN94	0
Flamicell		196	F6	OCT93	F6	JUN94	33
Flamicell		206	F6	OCT93	F6	JUN94	0
Flamicell		215	F6	OCT93	F6	JUN94	66
Flamicell		216	F6	OCT93	F6	JUN94	0
Flamicell		230	F6	JUN94	F6	OCT94	0
Flamicell		253	F7	JUN94	F7	OCT94	0
Flamicell		240	F7	JUN94	F7	OCT94	0
Flamicell	M	273	CNC	JUN94	CNC	OCT94	-59
Flamicell		264	F5	JUN94	F6	OCT94	-67
Flamicell		226	L3	JUN94	L3	OCT94	0
Flamicell		206	L3	JUN94	L3	OCT94	0
Flamicell		218	L3	JUN94	L3	OCT94	35
Flamicell		249	L3	JUN94	L3	OCT94	0
Flamicell		263	F6	JUN94	F6	OCT94	0
Flamicell		272	F6	JUN94	F6	OCT94	0
Flamicell		216	F5	JUN94	F5	OCT94	-33
Flamicell		237	F5	JUN94	F6	OCT94	-34
Flamicell	M	235	CNC	JUN94	F6	OCT94	-154
Flamicell		249	F6	JUN94	F5	OCT94	34
Flamicell		282	L2	JUN94	S12	OCT94	-135
Flamicell		258	F6	JUN94	F6	OCT94	0
Flamicell		257	F6	JUN94	F6	OCT94	0
Flamicell		273	L2	JUN94	L2	OCT94	0
Flamicell		282	F6	JUN94	F6	OCT94	33
Flamicell	M	235	F6	JUN94	F4	OCT94	134
Flamicell	M	237	F6	JUN94	F6	OCT94	0
Flamicell		212	F6	JUN94	F6	OCT94	0
Flamicell		205	F6	JUN94	F6	OCT94	0
Flamicell		294	CNC	JUN94	CNC	OCT94	0
Flamicell		228	F8	JUN94	F8	OCT94	0
Flamicell		241	F7	JUN94	F7	OCT94	33
Flamicell		210	F7	JUN94	F6	OCT94	67
Flamicell	M	260	F5	JUN94	CNC	OCT94	60
Flamicell		260	CNC	JUN94	F4	OCT94	20
Flamicell		204	F3	JUN94	F3	OCT94	0
Flamicell		208	F3	JUN94	F3	OCT94	0
Flamicell	M	256	F3	JUN94	F3	OCT94	0
Flamicell		253	F3	JUN94	F3	OCT94	0
Flamicell		183	F6	JUN94	F6	OCT94	33
Flamicell		209	F6	JUN94	F6	OCT94	33
Flamicell		232	F6	JUN94	F6	OCT94	0
Flamicell		196	F6	JUN94	F6	OCT94	33
Flamicell		207	F6	JUN94	F7	OCT94	-133
Flamicell		209	F6	JUN94	F6	OCT94	0
Flamicell		203	F6	JUN94	F6	OCT94	0
Flamicell		221	F6	JUN94	F6	OCT94	0
Flamicell		239	F6	JUN94	F6	OCT94	-33
Flamicell		264	F6	JUN94	F6	OCT94	0
Flamicell		176	F6	JUN94	F6	OCT94	0
Flamicell		210	F6	JUN94	S9	OCT94	784
Flamicell		250	L1	JUN94	L1	OCT94	-80
Flamicell		256	L1	JUN94	L2	OCT94	60
Flamicell		239	L2	JUN94	L2	OCT94	0
Flamicell		191	L2	JUN94	L2	OCT94	60
Flamicell		232	L2	JUN94	L2	OCT94	0
Flamicell		231	L2	JUN94	L3	OCT94	160
Flamicell		273	L2	JUN94	S12	OCT94	-165
Flamicell		232	L2	JUN94	L3	OCT94	100
Flamicell		229	L2	JUN94	L3	OCT94	100
Flamicell		303	L2	JUN94	L2	OCT94	-30
Flamicell		281	L3	JUN94	L2	OCT94	-125
Flamicell		218	L3	JUN94	L3	OCT94	35
Flamicell		214	L3	JUN94	L3	OCT94	0
Flamicell		212	L3	JUN94	L3	OCT94	0
Flamicell		188	L3	JUN94	L3	OCT94	0
Flamicell		302	F6	JUN94	F6	OCT94	0
Flamicell	M	274	F6	JUN94	F6	OCT94	0
Flamicell		287	F6	JUN94	F6	OCT94	0
Flamicell		292	F3	JUN94	F3	OCT94	50
Flamicell		277	CNC	JUN94	F3	OCT94	100
Flamicell	M	273	F3	JUN94	F3	OCT94	0
Flamicell		253	F6	JUN94	F2	OCT94	400
Flamicell		302	L1	JUN94	L1	OCT94	0
Flamicell		269	F7	JUN94	F6	OCT94	34
Flamicell		214	L3	JUN94	L2	OCT94	-160
Flamicell		188	L2	JUN94	L3	OCT94	65
Flamicell		263	L2	JUN94	L3	OCT94	100
Flamicell		289	L2	JUN94	L2	OCT94	-60
Flamicell	F	206	L3	JUN94	L3	OCT94	0
Flamicell		236	L3	JUN94	L3	OCT94	0
Flamicell		232	F6	JUN94	F6	OCT94	0
Flamicell		212	F6	JUN94	F6	OCT94	0
Flamicell		246	F6	JUN94	F6	OCT94	0
Flamicell		244	F6	JUN94	F6	OCT94	0
Flamicell		269	F6	JUN94	F6	OCT94	33
Flamicell		253	F6	JUN94	F6	OCT94	0
Flamicell		244	F6	JUN94	F6	OCT94	-33
Flamicell		385	L3	JUN94	L2	OCT94	-90
Pallaresa		182	D1	OCT92	D1	MAIG93	33
Pallaresa		156	D2	OCT92	D2	MAIG93	33
Pallaresa		167	D3	OCT92	D3	MAIG93	0
Pallaresa		139	D3	OCT92	D3	MAIG93	33
Pallaresa		176	D3	OCT92	D3	MAIG93	33
Pallaresa		179	D4	OCT92	D4	MAIG93	-25
Pallaresa		176	D4	OCT92	D4	MAIG93	0
Pallaresa		191	D5	OCT92	D5	MAIG93	0
Pallaresa		132	D5	OCT92	D5	MAIG93	30
Pallaresa		171	D5	OCT92	D6	MAIG93	125
Pallaresa		200	D5	OCT92	D5	MAIG93	-30
Pallaresa		204	D5	OCT92	D5	MAIG93	30
Pallaresa		157	D5	OCT92	D5	MAIG93	30
Pallaresa		150	D5	OCT92	H2	MAIG93	180
Pallaresa		194	D5	OCT92	D5	MAIG93	30
Pallaresa		165	D6	OCT92	D6	MAIG93	30
Pallaresa		144	D6	OCT92	D6	MAIG93	0
Pallaresa		171	D6	OCT92	D6	MAIG93	-30
Pallaresa		172	D6	OCT92	H1	MAIG93	60
Pallaresa		154	D6	OCT92	D6	MAIG93	30
Pallaresa		174	D6	OCT92	D6	MAIG93	30
Pallaresa		168	D6	OCT92	D6	MAIG93	30
Pallaresa		182	D6	OCT92	D6	MAIG93	30
Pallaresa		186	D6	OCT92	D6	MAIG93	30
Pallaresa		187	D6	OCT92	D6	MAIG93	-30
Pallaresa	M	214	D6	OCT92	D6	MAIG93	30
Pallaresa	M	173	D6	OCT92	D6	MAIG93	-30
Pallaresa		167	D6	OCT92	D6	MAIG93	0
Pallaresa		151	H1	OCT92	H1	MAIG93	0
Pallaresa	F	177	H2	OCT92	H2	MAIG93	0
Pallaresa	F	179	H2	OCT92	H4	MAIG93	50
Pallaresa		149	H1	OCT92	H1	MAIG93	0
Pallaresa		186	H1	OCT92	H1	MAIG93	0
Pallaresa		191	H2	OCT92	H2	MAIG93	0
Pallaresa		174	H3	OCT92	H3	MAIG93	0
Pallaresa		195	H3	OCT92	H3	MAIG93	0
Pallaresa		218	H3	OCT92	H3	MAIG93	0
Pallaresa		173	H4	OCT92	H4	MAIG93	0
Pallaresa		154	H4	OCT92	H4	MAIG93	0
Pallaresa		216	H4	OCT92	H4	MAIG93	0
Pallaresa		183	H3	OCT92	H3	MAIG93	0
Pallaresa		192	H3	OCT92	H3	MAIG93	0
Pallaresa		176	H4	OCT92	H4	MAIG93	0
Pallaresa		143	H6	OCT92	H6	MAIG93	0
Pallaresa		176	H6	OCT92	H6	MAIG93	0
Pallaresa		173	H6	OCT92	H6	MAIG93	0
Pallaresa		187	H6	OCT92	H6	MAIG93	0
Pallaresa		157	H5	OCT92	H5	MAIG93	0
Pallaresa		153	H6	OCT92	H6	MAIG93	0
Pallaresa		193	H6	OCT92	H6	MAIG93	0
Pallaresa		223	H6	OCT92	H7	MAIG93	25
Pallaresa		197	H6	OCT92	H6	MAIG93	0
Pallaresa		183	H5	OCT92	H5	MAIG93	0
Pallaresa		164	H6	OCT92	H6	MAIG93	0
Pallaresa		152	H7	OCT92	H7	MAIG93	0
Pallaresa		154	H7	OCT92	H6	MAIG93	-25
Pallaresa		137	H7	OCT92	H7	MAIG93	0
Pallaresa		167	H7	OCT92	H7	MAIG93	0
Pallaresa		179	H7	OCT92	H7	MAIG93	0
Pallaresa		161	H7	OCT92	H7	MAIG93	0
Pallaresa		191	H7	OCT92	H7	MAIG93	0
Pallaresa		238	H8	OCT92	H6	MAIG93	-50
Pallaresa		220	H8	OCT92	H8	MAIG93	0
Pallaresa		172	H7	OCT92	H10	MAIG93	75
Pallaresa		163	H7	OCT92	H7	MAIG93	0
Pallaresa		175	H8	OCT92	H8	MAIG93	0
Pallaresa		131	H9	OCT92	H9	MAIG93	0
Pallaresa		137	H9	OCT92	H10	MAIG93	25
Pallaresa		149	H9	OCT92	H9	MAIG93	0
Pallaresa		162	H9	OCT92	H10	MAIG93	25
Pallaresa	M	201	H9	OCT92	H9	MAIG93	0
Pallaresa		136	H10	OCT92	H11	MAIG93	25
Pallaresa		158	H10	OCT92	H9	MAIG93	-25
Pallaresa		183	H10	OCT92	H7	MAIG93	-75
Pallaresa		141	H10	OCT92	H11	MAIG93	25
Pallaresa		155	H10	OCT92	H10	MAIG93	0
Pallaresa		176	H10	OCT92	H10	MAIG93	0
Pallaresa		138	H10	OCT92	H8	MAIG93	-50
Pallaresa		150	H9	OCT92	H9	MAIG93	0
Pallaresa		155	H9	OCT92	H9	MAIG93	0
Pallaresa		150	H11	OCT92	H12	MAIG93	25
Pallaresa		190	H11	OCT92	H11	MAIG93	0
Pallaresa		162	H12	OCT92	H12	MAIG93	0
Pallaresa		183	H12	OCT92	H12	MAIG93	0
Pallaresa		153	H11	OCT92	H11	MAIG93	0
Pallaresa		198	H12	OCT92	H12	MAIG93	0
Pallaresa		190	U1	OCT92	U1	MAIG93	-30
Pallaresa		170	U1	OCT92	U1	MAIG93	30
Pallaresa		207	U1	OCT92	U1	MAIG93	-30
Pallaresa		196	U1	OCT92	U1	MAIG93	-30
Pallaresa		197	U1	OCT92	U1	MAIG93	-30
Pallaresa		187	U1	OCT92	U1	MAIG93	-30
Pallaresa		207	U1	OCT92	U1	MAIG93	-30
Pallaresa		204	U1	OCT92	H12	MAIG93	-55
Pallaresa		137	U1	OCT92	U1	MAIG93	30
Pallaresa		197	U1	OCT92	U1	MAIG93	30
Pallaresa		162	U1	OCT92	U1	MAIG93	0
Pallaresa		173	U1	OCT92	U1	MAIG93	0
Pallaresa		191	U1	OCT92	U1	MAIG93	30
Pallaresa		140	U1	OCT92	U1	MAIG93	-30
Pallaresa		143	U1	OCT92	H12	MAIG93	-55
Pallaresa		163	U1	OCT92	U1	MAIG93	30
Pallaresa		178	U1	OCT92	U1	MAIG93	30
Pallaresa		145	U1	OCT92	U1	MAIG93	-30
Pallaresa		148	U2	OCT92	U1	MAIG93	-68
Pallaresa		164	U2	OCT92	U2	MAIG93	0
Pallaresa		170	U2	OCT92	U2	MAIG93	0
Pallaresa		164	U2	OCT92	H10	MAIG93	-203
Pallaresa		184	U2	OCT92	H11	MAIG93	-178
Pallaresa		199	U2	OCT92	U2	MAIG93	33
Pallaresa		171	U2	OCT92	U2	MAIG93	33
Pallaresa		187	U2	OCT92	U1	MAIG93	-128
Pallaresa		203	U2	OCT92	U2	MAIG93	0
Pallaresa		195	U2	OCT92	U2	MAIG93	33
Pallaresa		188	U2	OCT92	U2	MAIG93	33
Pallaresa		201	U2	OCT92	U2	MAIG93	0
Pallaresa		162	U3	OCT92	U3	MAIG93	-33
Pallaresa		159	U3	OCT92	U3	MAIG93	-33
Pallaresa		193	U3	OCT92	U3	MAIG93	-33
Pallaresa		136	U3	OCT92	U3	MAIG93	0
Pallaresa		208	U3	OCT92	U3	MAIG93	-33
Pallaresa		196	U3	OCT92	U3	MAIG93	0
Pallaresa		209	U3	OCT92	U3	MAIG93	33
Pallaresa		220	U3	OCT92	U3	MAIG93	0
Pallaresa		293	U3	OCT92	U3	MAIG93	-33
Pallaresa		127	U3	OCT92	U3	MAIG93	33
Pallaresa		151	U3	OCT92	U3	MAIG93	33
Pallaresa		160	U3	OCT92	U3	MAIG93	33
Pallaresa		182	U3	OCT92	U3	MAIG93	33
Pallaresa		190	U3	OCT92	U3	MAIG93	33
Pallaresa		192	U3	OCT92	U3	MAIG93	33
Pallaresa		201	U3	OCT92	U3	MAIG93	33
Pallaresa		229	U3	OCT92	U3	MAIG93	33
Pallaresa		193	U3	OCT92	U3	MAIG93	-33
Pallaresa		163	U3	OCT92	U3	MAIG93	33
Pallaresa		188	U3	OCT92	U3	MAIG93	-33
Pallaresa		167	U4	OCT92	U4	MAIG93	0
Pallaresa		188	U4	OCT92	U4	MAIG93	0
Pallaresa		171	U4	OCT92	U4	MAIG93	66
Pallaresa		150	U4	OCT92	U3	MAIG93	-34
Pallaresa		177	U4	OCT92	U4	MAIG93	0
Pallaresa		178	U4	OCT92	U4	MAIG93	66
Pallaresa		210	U4	OCT92	U4	MAIG93	0
Pallaresa	M	216	U4	OCT92	U4	MAIG93	0
Pallaresa		156	U4	OCT92	U4	MAIG93	0
Pallaresa		183	U4	OCT92	U4	MAIG93	0
Pallaresa		186	U4	OCT92	U4	MAIG93	0
Pallaresa		184	U4	OCT92	U4	MAIG93	0
Pallaresa		140	U4	OCT92	U4	MAIG93	0
Pallaresa	M	148	U4	OCT92	U4	MAIG93	0
Pallaresa		175	U4	OCT92	U4	MAIG93	0
Pallaresa		207	U4	OCT92	U4	MAIG93	0
Pallaresa		208	U4	OCT92	U4	MAIG93	0
Pallaresa		290	U4	OCT92	U5	MAIG93	67
Pallaresa	M	242	U4	OCT92	U4	MAIG93	66
Pallaresa		173	U5	OCT92	U5	MAIG93	0
Pallaresa		171	U5	OCT92	U5	MAIG93	0
Pallaresa		163	U5	OCT92	U4	MAIG93	-34
Pallaresa		206	U5	OCT92	U5	MAIG93	0
Pallaresa		172	U5	OCT92	U5	MAIG93	-33
Pallaresa		230	U5	OCT92	U5	MAIG93	0
Pallaresa		178	U5	OCT92	U5	MAIG93	0
Pallaresa		180	U5	OCT92	U5	MAIG93	0
Pallaresa		183	U5	OCT92	U5	MAIG93	33
Pallaresa		178	U5	OCT92	U5	MAIG93	-33
Pallaresa		188	U5	OCT92	U5	MAIG93	0
Pallaresa		200	U5	OCT92	U5	MAIG93	0
Pallaresa	F	178	U5	OCT92	U5	MAIG93	0
Pallaresa		167	U5	OCT92	U5	MAIG93	0
Pallaresa		187	U5	OCT92	U5	MAIG93	0
Pallaresa		209	U5	OCT92	U5	MAIG93	0
Pallaresa	M	227	U5	OCT92	U5	MAIG93	0
Pallaresa		281	U5	OCT92	U1	MAIG93	-461
Pallaresa		158	U5	OCT92	D3	MAIG93	-1275
Pallaresa		178	U5	OCT92	U5	MAIG93	33
Pallaresa		213	U5	OCT92	U5	MAIG93	33
Pallaresa		158	U6	OCT92	U6	MAIG93	-33
Pallaresa		180	U6	OCT92	U6	MAIG93	-33
Pallaresa	M	183	U6	OCT92	U6	MAIG93	0
Pallaresa		183	U6	OCT92	U6	MAIG93	-33
Pallaresa	M	208	U6	OCT92	U6	MAIG93	0
Pallaresa		175	U6	OCT92	U6	MAIG93	0
Pallaresa	M	195	U6	OCT92	U6	MAIG93	-33
Pallaresa		186	U6	OCT92	U6	MAIG93	0
Pallaresa	F	194	U6	OCT92	U6	MAIG93	33
Pallaresa	M	206	U6	OCT92	U6	MAIG93	33
Pallaresa	F	208	U6	OCT92	U6	MAIG93	-33
Pallaresa		173	U6	OCT92	U6	MAIG93	33
Pallaresa		173	U6	OCT92	U6	MAIG93	33
Pallaresa	F	190	U7	OCT92	U7	MAIG93	-33
Pallaresa	M	189	U7	OCT92	U7	MAIG93	-33
Pallaresa	M	202	U7	OCT92	U7	MAIG93	-33
Pallaresa		148	U6	OCT92	U6	MAIG93	0
Pallaresa		173	U6	OCT92	U6	MAIG93	0
Pallaresa		167	U6	OCT92	U6	MAIG93	33
Pallaresa		197	U6	OCT92	U6	MAIG93	0
Pallaresa		179	U6	OCT92	U6	MAIG93	33
Pallaresa	F	230	U7	OCT92	U7	MAIG93	-33
Pallaresa		143	U7	OCT92	U7	MAIG93	33
Pallaresa	F	184	U7	OCT92	U7	MAIG93	0
Pallaresa		190	U7	OCT92	U7	MAIG93	33
Pallaresa	F	186	U7	OCT92	U7	MAIG93	33
Pallaresa		176	U7	OCT92	U7	MAIG93	-33
Pallaresa	M	203	U7	OCT92	U7	MAIG93	-33
Pallaresa		150	U7	OCT92	U7	MAIG93	33
Pallaresa		163	U7	OCT92	U7	MAIG93	-33
Pallaresa		166	U8	OCT92	U8	MAIG93	0
Pallaresa		177	U8	OCT92	U8	MAIG93	0
Pallaresa	F	202	U8	OCT92	U8	MAIG93	0
Pallaresa		160	U8	OCT92	U8	MAIG93	0
Pallaresa		165	U8	OCT92	U8	MAIG93	0
Pallaresa	M	203	U8	OCT92	U8	MAIG93	0
Pallaresa		180	U8	OCT92	U8	MAIG93	-30
Pallaresa		204	U8	OCT92	U8	MAIG93	-30
Pallaresa	M	263	U8	OCT92	U8	MAIG93	-30
Pallaresa		153	U8	OCT92	U8	MAIG93	30
Pallaresa		184	U8	OCT92	U8	MAIG93	30
Pallaresa		177	U8	OCT92	U8	MAIG93	30
Pallaresa		167	U8	OCT92	U8	MAIG93	30
Pallaresa		192	U8	OCT92	U8	MAIG93	30
Pallaresa	M	209	U8	OCT92	U8	MAIG93	30
Pallaresa		227	U8	OCT92	U8	MAIG93	-30
Pallaresa		350	U8	OCT92	U9	MAIG93	223
Pallaresa		133	U8	OCT92	U8	MAIG93	30
Pallaresa		215	U8	OCT92	U8	MAIG93	30
Pallaresa		195	U8	OCT92	U8	MAIG93	30
Pallaresa		199	U8	OCT92	U4	MAIG93	-764
Pallaresa		136	U8	OCT92	U8	MAIG93	30
Pallaresa		157	U8	OCT92	U8	MAIG93	-30
Pallaresa		147	U8	OCT92	U8	MAIG93	30
Pallaresa		184	U8	OCT92	U8	MAIG93	0
Pallaresa	M	221	U8	OCT92	U8	MAIG93	-30
Pallaresa		137	U8	OCT92	U12	MAIG93	1139
Pallaresa	F	188	U8	OCT92	U8	MAIG93	30
Pallaresa		178	U8	OCT92	U8	MAIG93	30
Pallaresa	F	199	U8	OCT92	U8	MAIG93	30
Pallaresa	F	208	U8	OCT92	U8	MAIG93	30
Pallaresa		157	U9	OCT92	U9	MAIG93	0
Pallaresa		160	U9	OCT92	U9	MAIG93	0
Pallaresa		185	U9	OCT92	U9	MAIG93	-33
Pallaresa		199	U9	OCT92	U9	MAIG93	-33
Pallaresa	F	221	U9	OCT92	U9	MAIG93	-33
Pallaresa	M	223	U9	OCT92	U8	MAIG93	-193
Pallaresa	F	238	U9	OCT92	U9	MAIG93	-33
Pallaresa		148	U9	OCT92	U9	MAIG93	33
Pallaresa		173	U9	OCT92	U9	MAIG93	0
Pallaresa		168	U9	OCT92	U9	MAIG93	0
Pallaresa		207	U9	OCT92	U9	MAIG93	33
Pallaresa		197	U9	OCT92	U9	MAIG93	33
Pallaresa		178	U9	OCT92	U9	MAIG93	-33
Pallaresa		156	U9	OCT92	U9	MAIG93	33
Pallaresa		207	U9	OCT92	U9	MAIG93	0
Pallaresa	M	196	U9	OCT92	U9	MAIG93	33
Pallaresa	M	218	U9	OCT92	U9	MAIG93	0
Pallaresa		194	U9	OCT92	U9	MAIG93	0
Pallaresa	F	192	U9	OCT92	U9	MAIG93	0
Pallaresa		158	U9	OCT92	U9	MAIG93	33
Pallaresa		164	U9	OCT92	U9	MAIG93	33
Pallaresa		150	U9	OCT92	U9	MAIG93	0
Pallaresa	F	187	U9	OCT92	U9	MAIG93	0
Pallaresa		207	U9	OCT92	U9	MAIG93	33
Pallaresa		140	U9	OCT92	U9	MAIG93	33
Pallaresa		220	U9	OCT92	U9	MAIG93	0
Pallaresa	F	204	U9	OCT92	U9	MAIG93	0
Pallaresa	M	346	U9	OCT92	U9	MAIG93	-33
Pallaresa		129	U10	OCT92	U10	MAIG93	-30
Pallaresa		183	U10	OCT92	U10	MAIG93	-30
Pallaresa		175	U10	OCT92	U10	MAIG93	-30
Pallaresa	F	198	U10	OCT92	U10	MAIG93	-30
Pallaresa		217	U10	OCT92	U10	MAIG93	-30
Pallaresa	F	236	U10	OCT92	U10	MAIG93	0
Pallaresa	F	220	U10	OCT92	U10	MAIG93	-30
Pallaresa	M	269	U10	OCT92	U10	MAIG93	-30
Pallaresa		139	U10	OCT92	U10	MAIG93	-30
Pallaresa		165	U10	OCT92	U10	MAIG93	30
Pallaresa		159	U10	OCT92	U10	MAIG93	30
Pallaresa	F	193	U10	OCT92	U10	MAIG93	30
Pallaresa	F	235	U10	OCT92	U10	MAIG93	0
Pallaresa		143	U10	OCT92	U10	MAIG93	30
Pallaresa		148	U10	OCT92	U10	MAIG93	-30
Pallaresa	F	160	U10	OCT92	U10	MAIG93	30
Pallaresa		168	U10	OCT92	U10	MAIG93	30
Pallaresa		148	U10	OCT92	U10	MAIG93	0
Pallaresa	F	191	U10	OCT92	U10	MAIG93	0
Pallaresa	F	210	U11	OCT92	U11	MAIG93	-25
Pallaresa	M	171	U10	OCT92	U10	MAIG93	0
Pallaresa		130	U11	OCT92	U11	MAIG93	0
Pallaresa		180	U11	OCT92	U11	MAIG93	-25
Pallaresa		180	U11	OCT92	U11	MAIG93	0
Pallaresa		177	U11	OCT92	U11	MAIG93	-25
Pallaresa		187	U11	OCT92	U11	MAIG93	-25
Pallaresa		177	U11	OCT92	U11	MAIG93	-25
Pallaresa		168	U11	OCT92	U11	MAIG93	0
Pallaresa		223	U11	OCT92	U11	MAIG93	-25
Pallaresa		197	U11	OCT92	U11	MAIG93	0
Pallaresa	M	190	U11	OCT92	U11	MAIG93	-25
Pallaresa		237	U11	OCT92	U11	MAIG93	0
Pallaresa	M	286	U11	OCT92	U11	MAIG93	0
Pallaresa		157	U11	OCT92	U11	MAIG93	-25
Pallaresa		130	U12	OCT92	U12	MAIG93	-40
Pallaresa	M	167	U12	OCT92	U12	MAIG93	0
Pallaresa		178	U12	OCT92	U12	MAIG93	-40
Pallaresa		211	U12	OCT92	U12	MAIG93	-40
Pallaresa		184	U12	OCT92	U12	MAIG93	0
Pallaresa	F	217	U12	OCT92	U12	MAIG93	0
Pallaresa	F	230	U12	OCT92	U9	MAIG93	-909
Pallaresa		150	U12	OCT92	U12	MAIG93	0
Pallaresa		162	U12	OCT92	U12	MAIG93	40
Pallaresa		162	U12	OCT92	U12	MAIG93	0
Pallaresa		141	U12	OCT92	U12	MAIG93	0
Pallaresa		189	U12	OCT92	U12	MAIG93	40
Pallaresa		139	U12	OCT92	U12	MAIG93	40
Pallaresa		184	U12	OCT92	U12	MAIG93	40
Pallaresa		149	U12	OCT92	U12	MAIG93	0
Pallaresa	M	231	U12	OCT92	U12	MAIG93	0
Pallaresa		207	U12	OCT92	U12	MAIG93	40
Pallaresa	F	228	U12	OCT92	U12	MAIG93	40
Pallaresa	M	198	U12	OCT92	U12	MAIG93	0
Pallaresa	M	308	U12	OCT92	U9	MAIG93	-909
Pallaresa		139	U12	OCT92	U12	MAIG93	40
Pallaresa		153	U12	OCT92	U12	MAIG93	-40
Pallaresa	M	168	U12	OCT92	U12	MAIG93	40
Pallaresa		128	U12	OCT92	U12	MAIG93	-40
Pallaresa	M	176	U12	OCT92	U12	MAIG93	0
Pallaresa		182	U12	OCT92	U12	MAIG93	40
Pallaresa		227	U12	OCT92	U9	MAIG93	-843
Pallaresa		128	U12	OCT92	U12	MAIG93	40
Pallaresa		149	U13	OCT92	U13	MAIG93	33
Pallaresa		203	U13	OCT92	U13	MAIG93	-33
Pallaresa		193	U13	OCT92	U13	MAIG93	0
Pallaresa	F	220	U13	OCT92	U13	MAIG93	0
Pallaresa	F	236	U13	OCT92	U13	MAIG93	-33
Pallaresa		174	U13	OCT92	U13	MAIG93	33
Pallaresa	M	169	U13	OCT92	U13	MAIG93	33
Pallaresa		134	U13	OCT92	U13	MAIG93	-33
Pallaresa		164	U13	OCT92	U13	MAIG93	0
Pallaresa	F	190	U13	OCT92	U13	MAIG93	0
Pallaresa	M	183	U13	OCT92	U13	MAIG93	-33
Pallaresa	M	232	U13	OCT92	U13	MAIG93	0
Pallaresa	F	224	U13	OCT92	U13	MAIG93	33
Pallaresa	M	247	U13	OCT92	U13	MAIG93	-33
Pallaresa		157	U13	OCT92	U13	MAIG93	-33
Pallaresa		174	U13	OCT92	U13	MAIG93	-33
Pallaresa		190	U13	OCT92	U13	MAIG93	-33
Pallaresa		157	U13	OCT92	U13	MAIG93	33
Pallaresa	F	212	U13	OCT92	U13	MAIG93	33
Pallaresa	F	228	U13	OCT92	U13	MAIG93	0
Pallaresa		136	U14	OCT92	U14	MAIG93	-40
Pallaresa		145	U14	OCT92	U14	MAIG93	40
Pallaresa		158	U14	OCT92	D5	MAIG93	-3729
Pallaresa	F	201	U14	OCT92	U14	MAIG93	0
Pallaresa	F	223	U14	OCT92	U9	MAIG93	-1863
Pallaresa		173	U14	OCT92	U14	MAIG93	-40
Pallaresa	F	234	U14	OCT92	U14	MAIG93	0
Pallaresa	M	176	U14	OCT92	U14	MAIG93	40
Pallaresa		133	U14	OCT92	U14	MAIG93	40
Pallaresa	M	198	U14	OCT92	U14	MAIG93	0
Pallaresa	M	272	U14	OCT92	U14	MAIG93	0
Pallaresa		143	U15	OCT92	U15	MAIG93	-35
Pallaresa		147	U15	OCT92	U15	MAIG93	35
Pallaresa	M	224	U15	OCT92	U15	MAIG93	-35
Pallaresa	F	186	U15	OCT92	U15	MAIG93	35
Pallaresa	M	171	U15	OCT92	U15	MAIG93	0
Pallaresa		211	D5	MAIG93	D5	NOV93	0
Pallaresa		239	D6	MAIG93	D5	NOV93	-95
Pallaresa		192	D6	MAIG93	H12	NOV93	365
Pallaresa	M	186	D6	MAIG93	D6	NOV93	0
Pallaresa		196	H2	MAIG93	H2	NOV93	0
Pallaresa		184	H4	MAIG93	H3	NOV93	-25
Pallaresa	M	198	H6	MAIG93	H6	NOV93	0
Pallaresa		173	H6	MAIG93	H6	NOV93	0
Pallaresa	M	234	H7	MAIG93	H6	NOV93	-25
Pallaresa	F	195	H5	MAIG93	H5	NOV93	0
Pallaresa		190	H7	MAIG93	H7	NOV93	0
Pallaresa		171	H9	MAIG93	U1	NOV93	100
Pallaresa		185	H9	MAIG93	H9	NOV93	0
Pallaresa		169	H11	MAIG93	H11	NOV93	0
Pallaresa		182	H8	MAIG93	H11	NOV93	75
Pallaresa		172	H9	MAIG93	H9	NOV93	0
Pallaresa		193	H12	MAIG93	H12	NOV93	0
Pallaresa	M	225	U1	MAIG93	U2	NOV93	161
Pallaresa		191	U1	MAIG93	U1	NOV93	0
Pallaresa		183	H11	MAIG93	H6	NOV93	-125
Pallaresa		170	U3	MAIG93	U5	NOV93	167
Pallaresa		167	U3	MAIG93	U4	NOV93	100
Pallaresa		219	U4	MAIG93	U4	NOV93	0
Pallaresa	F	206	U4	MAIG93	U4	NOV93	-33
Pallaresa	F	184	U4	MAIG93	U4	NOV93	0
Pallaresa		191	U4	MAIG93	U4	NOV93	0
Pallaresa		210	U4	MAIG93	U4	NOV93	0
Pallaresa		293	U5	MAIG93	U5	NOV93	33
Pallaresa		185	U5	MAIG93	U5	NOV93	0
Pallaresa		187	U5	MAIG93	U5	NOV93	33
Pallaresa		189	U5	MAIG93	U5	NOV93	0
Pallaresa		283	U1	MAIG93	U7	NOV93	828
Pallaresa		185	U5	MAIG93	U5	NOV93	0
Pallaresa		178	U6	MAIG93	U6	NOV93	0
Pallaresa		217	U6	MAIG93	U6	NOV93	33
Pallaresa		208	U7	MAIG93	U7	NOV93	0
Pallaresa		172	U6	MAIG93	U6	NOV93	0
Pallaresa		190	U7	MAIG93	U7	NOV93	33
Pallaresa		210	U8	MAIG93	U8	NOV93	0
Pallaresa		162	U8	MAIG93	U8	NOV93	0
Pallaresa		216	U8	MAIG93	U8	NOV93	0
Pallaresa		166	U8	MAIG93	U8	NOV93	0
Pallaresa		224	U8	MAIG93	U8	NOV93	30
Pallaresa		206	U8	MAIG93	U8	NOV93	0
Pallaresa		211	U8	MAIG93	U8	NOV93	0
Pallaresa	F	237	U9	MAIG93	U9	NOV93	0
Pallaresa		182	U9	MAIG93	U9	NOV93	0
Pallaresa		212	U9	MAIG93	U9	NOV93	0
Pallaresa		181	U9	MAIG93	U9	NOV93	0
Pallaresa		233	U9	MAIG93	U9	NOV93	0
Pallaresa		182	U9	MAIG93	U9	NOV93	0
Pallaresa		156	U10	MAIG93	U10	NOV93	0
Pallaresa		210	U10	MAIG93	U10	NOV93	30
Pallaresa	M	215	U10	MAIG93	U10	NOV93	0
Pallaresa		186	U10	MAIG93	U10	NOV93	0
Pallaresa		174	U10	MAIG93	U10	NOV93	0
Pallaresa		194	U11	MAIG93	U11	NOV93	25
Pallaresa		199	U11	MAIG93	U11	NOV93	0
Pallaresa		201	U11	MAIG93	U11	NOV93	25
Pallaresa		157	U12	MAIG93	U12	NOV93	0
Pallaresa		186	U12	MAIG93	U12	NOV93	-40
Pallaresa		186	U12	MAIG93	U12	NOV93	0
Pallaresa		160	U12	MAIG93	U12	NOV93	40
Pallaresa		168	U12	MAIG93	U12	NOV93	0
Pallaresa	M	231	U12	MAIG93	U12	NOV93	40
Pallaresa		231	U12	MAIG93	U12	NOV93	0
Pallaresa		156	U12	MAIG93	U12	NOV93	0
Pallaresa	M	197	U12	MAIG93	U12	NOV93	0
Pallaresa		189	U12	MAIG93	U12	NOV93	0
Pallaresa		226	U9	MAIG93	U9	NOV93	-33
Pallaresa	M	225	U13	MAIG93	U13	NOV93	0
Pallaresa		241	U13	MAIG93	U13	NOV93	0
Pallaresa	F	252	U13	MAIG93	U13	NOV93	0
Pallaresa		204	U13	MAIG93	U13	NOV93	0
Pallaresa		197	U13	MAIG93	U13	NOV93	0
Pallaresa		232	U13	MAIG93	U13	NOV93	33
Pallaresa	F	237	U14	MAIG93	U14	NOV93	40
Pallaresa		178	D5	MAIG93	D5	NOV93	0
Pallaresa	M	202	D5	MAIG93	D5	NOV93	0
Pallaresa	F	229	D3	MAIG93	D3	NOV93	0
Pallaresa	F	204	D3	MAIG93	D3	NOV93	0
Pallaresa		178	D2	MAIG93	D2	NOV93	0
Pallaresa	F	170	H5	MAIG93	H5	NOV93	0
Pallaresa		171	H5	MAIG93	H3	NOV93	-50
Pallaresa		194	H5	MAIG93	U5	NOV93	661
Pallaresa		195	H7	MAIG93	H7	NOV93	0
Pallaresa		169	H8	MAIG93	H8	NOV93	0
Pallaresa		178	H8	MAIG93	H7	NOV93	-25
Pallaresa		193	H8	MAIG93	H7	NOV93	-25
Pallaresa		160	H9	MAIG93	H9	NOV93	0
Pallaresa		181	H9	MAIG93	H9	NOV93	0
Pallaresa		178	H7	MAIG93	H9	NOV93	50
Pallaresa		173	H11	MAIG93	H10	NOV93	-25
Pallaresa		162	H11	MAIG93	H9	NOV93	-50
Pallaresa		163	H11	MAIG93	H11	NOV93	0
Pallaresa		195	H11	MAIG93	H11	NOV93	0
Pallaresa		202	H11	MAIG93	H11	NOV93	0
Pallaresa		176	H12	MAIG93	H12	NOV93	0
Pallaresa		175	H12	MAIG93	H12	NOV93	0
Pallaresa		161	H11	MAIG93	H11	NOV93	0
Pallaresa		176	H11	MAIG93	H11	NOV93	0
Pallaresa		211	H11	MAIG93	H11	NOV93	0
Pallaresa		164	H12	MAIG93	H12	NOV93	0
Pallaresa		174	U1	MAIG93	U1	NOV93	0
Pallaresa		181	U1	MAIG93	U1	NOV93	0
Pallaresa		188	U1	MAIG93	U1	NOV93	0
Pallaresa		148	U2	MAIG93	U2	NOV93	33
Pallaresa		160	U2	MAIG93	U2	NOV93	0
Pallaresa		203	U2	MAIG93	U2	NOV93	0
Pallaresa		229	U3	MAIG93	U3	NOV93	0
Pallaresa		158	U3	MAIG93	U3	NOV93	0
Pallaresa	M	184	U3	MAIG93	U3	NOV93	0
Pallaresa	M	135	U3	MAIG93	U3	NOV93	0
Pallaresa		126	U3	MAIG93	D3	NOV93	-1042
Pallaresa		167	U3	MAIG93	U4	NOV93	133
Pallaresa		173	U3	MAIG93	U3	NOV93	0
Pallaresa		189	U3	MAIG93	U3	NOV93	0
Pallaresa		203	U3	MAIG93	U4	NOV93	34
Pallaresa		190	U3	MAIG93	U3	NOV93	0
Pallaresa		190	U3	MAIG93	U3	NOV93	-33
Pallaresa		176	U3	MAIG93	U3	NOV93	0
Pallaresa	M	237	U4	MAIG93	U4	NOV93	0
Pallaresa		159	U4	MAIG93	U4	NOV93	0
Pallaresa		185	U4	MAIG93	U4	NOV93	0
Pallaresa		191	U5	MAIG93	U5	NOV93	0
Pallaresa		204	U6	MAIG93	U5	NOV93	-200
Pallaresa	M	152	U6	MAIG93	U6	NOV93	0
Pallaresa	M	255	U7	MAIG93	U7	NOV93	33
Pallaresa		154	U7	MAIG93	U7	NOV93	0
Pallaresa		186	U7	MAIG93	U7	NOV93	0
Pallaresa		213	U7	MAIG93	U7	NOV93	-33
Pallaresa		190	U8	MAIG93	U8	NOV93	0
Pallaresa	M	221	U8	MAIG93	U7	NOV93	-234
Pallaresa	M	152	U8	MAIG93	U8	NOV93	0
Pallaresa		205	U8	MAIG93	U8	NOV93	0
Pallaresa		191	U8	MAIG93	U8	NOV93	-30
Pallaresa		213	U8	MAIG93	U8	NOV93	0
Pallaresa		232	U8	MAIG93	U8	NOV93	0
Pallaresa	M	168	U8	MAIG93	U8	NOV93	0
Pallaresa		205	U9	MAIG93	U9	NOV93	0
Pallaresa	M	183	U9	MAIG93	U9	NOV93	0
Pallaresa	F	218	U9	MAIG93	U8	NOV93	-160
Pallaresa		217	U9	MAIG93	U8	NOV93	-160
Pallaresa		152	U9	MAIG93	U9	NOV93	0
Pallaresa		188	U9	MAIG93	U9	NOV93	-33
Pallaresa	M	269	U9	MAIG93	U9	NOV93	-33
Pallaresa	F	268	U9	MAIG93	U9	NOV93	-33
Pallaresa		180	U9	MAIG93	U9	NOV93	0
Pallaresa		191	U10	MAIG93	U10	NOV93	0
Pallaresa		208	U10	MAIG93	U10	NOV93	0
Pallaresa	F	202	U10	MAIG93	U10	NOV93	0
Pallaresa		224	U10	MAIG93	U11	NOV93	215
Pallaresa		235	U11	MAIG93	U11	NOV93	25
Pallaresa		235	U11	MAIG93	U11	NOV93	25
Pallaresa		138	U11	MAIG93	U11	NOV93	25
Pallaresa	M	221	U11	MAIG93	U11	NOV93	25
Pallaresa		172	U12	MAIG93	U12	NOV93	0
Pallaresa		190	U12	MAIG93	U12	NOV93	0
Pallaresa		144	U12	MAIG93	U12	NOV93	0
Pallaresa		0	U12	MAIG93	U1	NOV93	190
Pallaresa		180	U13	MAIG93	U13	NOV93	0
Pallaresa		154	U14	MAIG93	U14	NOV93	40
Pallaresa		188	U14	MAIG93	U14	NOV93	0
Pallaresa		167	D1	NOV93	D1	JUL94	33
Pallaresa		179	D1	NOV93	D1	JUL94	-33
Pallaresa		192	D1	NOV93	D1	JUL94	0
Pallaresa		192	D2	NOV93	D2	JUL94	0
Pallaresa		156	D2	NOV93	D2	JUL94	0
Pallaresa		170	D2	NOV93	D2	JUL94	0
Pallaresa		171	D2	NOV93	D2	JUL94	0
Pallaresa		156	D3	NOV93	D3	JUL94	0
Pallaresa		187	D4	NOV93	D4	JUL94	0
Pallaresa	M	192	D5	NOV93	D5	JUL94	0
Pallaresa		202	D5	NOV93	H6	JUL94	310
Pallaresa		174	D5	NOV93	D5	JUL94	0
Pallaresa		154	D5	NOV93	D5	JUL94	-30
Pallaresa		157	D5	NOV93	D5	JUL94	0
Pallaresa	M	245	D5	NOV93	D6	JUL94	35
Pallaresa		208	D5	NOV93	D5	JUL94	0
Pallaresa		159	D5	NOV93	D5	JUL94	0
Pallaresa		143	D6	NOV93	H2	JUL94	115
Pallaresa		143	D6	NOV93	D6	JUL94	0
Pallaresa	M	174	D6	NOV93	D6	JUL94	0
Pallaresa		176	D6	NOV93	D6	JUL94	0
Pallaresa		220	D6	NOV93	D6	JUL94	0
Pallaresa		147	D6	NOV93	D6	JUL94	0
Pallaresa		171	D6	NOV93	D4	JUL94	-225
Pallaresa		183	H1	NOV93	H1	JUL94	0
Pallaresa		184	H1	NOV93	H1	JUL94	0
Pallaresa		179	H1	NOV93	D6	JUL94	-30
Pallaresa		159	H1	NOV93	D6	JUL94	-30
Pallaresa		160	H10	NOV93	H10	JUL94	0
Pallaresa		169	H10	NOV93	H10	JUL94	0
Pallaresa		183	H10	NOV93	H10	JUL94	0
Pallaresa		167	H11	NOV93	H11	JUL94	0
Pallaresa		182	H11	NOV93	H10	JUL94	-25
Pallaresa		156	H12	NOV93	H4	JUL94	-200
Pallaresa		287	H12	NOV93	U1	JUL94	25
Pallaresa		170	H12	NOV93	H12	JUL94	0
Pallaresa		174	H12	NOV93	H12	JUL94	0
Pallaresa		170	H12	NOV93	H12	JUL94	0
Pallaresa		208	H12	NOV93	H12	JUL94	0
Pallaresa		198	H2	NOV93	H2	JUL94	0
Pallaresa		145	H2	NOV93	D5	JUL94	-180
Pallaresa	M	182	H2	NOV93	H1	JUL94	-25
Pallaresa		173	H2	NOV93	H2	JUL94	0
Pallaresa		178	H2	NOV93	H2	JUL94	0
Pallaresa	F	167	H2	NOV93	H2	JUL94	0
Pallaresa		149	H3	NOV93	H2	JUL94	-25
Pallaresa		155	H3	NOV93	H3	JUL94	0
Pallaresa		154	H3	NOV93	H4	JUL94	25
Pallaresa		178	H3	NOV93	H3	JUL94	0
Pallaresa		163	H3	NOV93	H3	JUL94	0
Pallaresa		167	H4	NOV93	H4	JUL94	0
Pallaresa		184	H4	NOV93	H5	JUL94	25
Pallaresa		179	H4	NOV93	H5	JUL94	25
Pallaresa		218	H4	NOV93	H5	JUL94	25
Pallaresa		147	H4	NOV93	H4	JUL94	0
Pallaresa		154	H4	NOV93	H7	JUL94	75
Pallaresa		176	H5	NOV93	H5	JUL94	0
Pallaresa		233	H5	NOV93	H6	JUL94	25
Pallaresa		184	H6	NOV93	H6	JUL94	0
Pallaresa		238	H6	NOV93	H5	JUL94	-25
Pallaresa		140	H6	NOV93	H6	JUL94	0
Pallaresa		174	H6	NOV93	H6	JUL94	0
Pallaresa		152	H6	NOV93	H7	JUL94	25
Pallaresa		187	H6	NOV93	H7	JUL94	25
Pallaresa		167	H6	NOV93	H6	JUL94	0
Pallaresa		202	H6	NOV93	H6	JUL94	0
Pallaresa		151	H6	NOV93	H6	JUL94	0
Pallaresa		161	H6	NOV93	H5	JUL94	-25
Pallaresa		202	H7	NOV93	H6	JUL94	-25
Pallaresa		188	H7	NOV93	H7	JUL94	0
Pallaresa		177	H7	NOV93	H7	JUL94	0
Pallaresa		140	H8	NOV93	H8	JUL94	0
Pallaresa		169	H8	NOV93	H9	JUL94	25
Pallaresa		174	H8	NOV93	H7	JUL94	-25
Pallaresa		163	H8	NOV93	H7	JUL94	-25
Pallaresa		167	H9	NOV93	H9	JUL94	0
Pallaresa		139	H9	NOV93	H9	JUL94	0
Pallaresa		167	H9	NOV93	U2	JUL94	261
Pallaresa		156	H9	NOV93	H9	JUL94	0
Pallaresa		149	H9	NOV93	H9	JUL94	0
Pallaresa		164	H9	NOV93	H8	JUL94	-25
Pallaresa		206	H9	NOV93	H10	JUL94	25
Pallaresa		166	H9	NOV93	H9	JUL94	0
Pallaresa		176	H9	NOV93	H10	JUL94	25
Pallaresa		188	H9	NOV93	H9	JUL94	0
Pallaresa		156	H9	NOV93	H10	JUL94	25
Pallaresa		168	H9	NOV93	H10	JUL94	25
Pallaresa		157	U10	NOV93	U10	JUL94	0
Pallaresa		182	U10	NOV93	U10	JUL94	0
Pallaresa	F	174	U10	NOV93	U10	JUL94	0
Pallaresa		212	U10	NOV93	U10	JUL94	0
Pallaresa		148	U10	NOV93	U10	JUL94	0
Pallaresa		197	U10	NOV93	U10	JUL94	0
Pallaresa		168	U10	NOV93	U10	JUL94	0
Pallaresa		240	U10	NOV93	U10	JUL94	0
Pallaresa		157	U10	NOV93	U10	JUL94	-30
Pallaresa	F	218	U10	NOV93	U10	JUL94	-30
Pallaresa		191	U10	NOV93	U10	JUL94	0
Pallaresa		207	U10	NOV93	U10	JUL94	0
Pallaresa		190	U10	NOV93	U10	JUL94	0
Pallaresa		149	U11	NOV93	U11	JUL94	0
Pallaresa		159	U11	NOV93	U9	JUL94	-394
Pallaresa		200	U11	NOV93	U11	JUL94	25
Pallaresa		163	U11	NOV93	U11	JUL94	0
Pallaresa		241	U11	NOV93	U11	JUL94	0
Pallaresa	M	207	U11	NOV93	U11	JUL94	0
Pallaresa		232	U11	NOV93	U11	JUL94	0
Pallaresa		190	U11	NOV93	U11	JUL94	0
Pallaresa		157	U11	NOV93	U11	JUL94	0
Pallaresa	F	229	U11	NOV93	U11	JUL94	-25
Pallaresa		192	U12	NOV93	U12	JUL94	0
Pallaresa		221	U12	NOV93	U12	JUL94	0
Pallaresa		247	U12	NOV93	U12	JUL94	0
Pallaresa		213	U12	NOV93	U12	JUL94	40
Pallaresa		155	U12	NOV93	U12	JUL94	0
Pallaresa	M	202	U12	NOV93	U12	JUL94	0
Pallaresa		173	U12	NOV93	U12	JUL94	0
Pallaresa	M	187	U12	NOV93	U12	JUL94	0
Pallaresa		187	U12	NOV93	U12	JUL94	0
Pallaresa		162	U12	NOV93	U12	JUL94	0
Pallaresa		170	U12	NOV93	U12	JUL94	0
Pallaresa		199	U12	NOV93	U12	JUL94	0
Pallaresa		208	U12	NOV93	U12	JUL94	0
Pallaresa	M	189	U12	NOV93	U12	JUL94	-40
Pallaresa	M	174	U12	NOV93	U12	JUL94	0
Pallaresa		162	U12	NOV93	U12	JUL94	-40
Pallaresa		200	U12	NOV93	U12	JUL94	0
Pallaresa		163	U12	NOV93	U12	JUL94	0
Pallaresa	F	232	U12	NOV93	U12	JUL94	0
Pallaresa	F	203	U12	NOV93	U12	JUL94	-40
Pallaresa		186	U13	NOV93	U13	JUL94	0
Pallaresa		173	U13	NOV93	U13	JUL94	33
Pallaresa		157	U13	NOV93	U13	JUL94	0
Pallaresa		193	U13	NOV93	U13	JUL94	33
Pallaresa		197	U13	NOV93	U13	JUL94	0
Pallaresa	F	233	U13	NOV93	U13	JUL94	0
Pallaresa	M	228	U13	NOV93	U5	JUL94	-2276
Pallaresa		173	U13	NOV93	U13	JUL94	0
Pallaresa		139	U13	NOV93	U13	JUL94	0
Pallaresa		178	U13	NOV93	U13	JUL94	33
Pallaresa	F	232	U13	NOV93	U13	JUL94	-33
Pallaresa	M	243	U13	NOV93	U13	JUL94	-33
Pallaresa		179	U14	NOV93	U14	JUL94	0
Pallaresa		193	U14	NOV93	U14	JUL94	0
Pallaresa		164	U14	NOV93	U14	JUL94	-40
Pallaresa		162	U14	NOV93	U14	JUL94	0
Pallaresa		179	U14	NOV93	U13	JUL94	-547
Pallaresa		185	U1	NOV93	U1	JUL94	0
Pallaresa		145	U1	NOV93	U1	JUL94	30
Pallaresa		174	U1	NOV93	U1	JUL94	0
Pallaresa		177	U1	NOV93	U1	JUL94	0
Pallaresa		200	U1	NOV93	U1	JUL94	0
Pallaresa		172	U1	NOV93	U1	JUL94	0
Pallaresa		184	U1	NOV93	U1	JUL94	0
Pallaresa		147	U1	NOV93	U2	JUL94	35
Pallaresa		177	U2	NOV93	U2	JUL94	0
Pallaresa		167	U2	NOV93	U2	JUL94	0
Pallaresa		172	U2	NOV93	U2	JUL94	0
Pallaresa		154	U2	NOV93	U2	JUL94	-33
Pallaresa		212	U2	NOV93	U2	JUL94	0
Pallaresa		194	U2	NOV93	U3	JUL94	100
Pallaresa		192	U3	NOV93	U3	JUL94	33
Pallaresa		166	U3	NOV93	U3	JUL94	0
Pallaresa		198	U3	NOV93	U3	JUL94	33
Pallaresa		201	U3	NOV93	U3	JUL94	0
Pallaresa		173	U3	NOV93	U3	JUL94	0
Pallaresa		146	U4	NOV93	U4	JUL94	33
Pallaresa		159	U4	NOV93	U4	JUL94	0
Pallaresa		159	U4	NOV93	U4	JUL94	0
Pallaresa		184	U4	NOV93	H7	JUL94	-478
Pallaresa		190	U4	NOV93	U4	JUL94	0
Pallaresa		171	U4	NOV93	U4	JUL94	-33
Pallaresa		195	U4	NOV93	U4	JUL94	0
Pallaresa		156	U4	NOV93	U4	JUL94	0
Pallaresa		168	U4	NOV93	U4	JUL94	0
Pallaresa		176	U4	NOV93	U1	JUL94	-301
Pallaresa		167	U4	NOV93	U3	JUL94	-133
Pallaresa	M	194	U4	NOV93	U5	JUL94	34
Pallaresa		194	U4	NOV93	U4	JUL94	0
Pallaresa		212	U4	NOV93	U4	JUL94	0
Pallaresa		180	U4	NOV93	U4	JUL94	0
Pallaresa		192	U4	NOV93	U4	JUL94	0
Pallaresa		171	U4	NOV93	U4	JUL94	-33
Pallaresa		167	U4	NOV93	U4	JUL94	-33
Pallaresa		177	U4	NOV93	U5	JUL94	34
Pallaresa		191	U5	NOV93	U5	JUL94	0
Pallaresa		170	U5	NOV93	U5	JUL94	0
Pallaresa		194	U5	NOV93	U5	JUL94	-33
Pallaresa		182	U5	NOV93	U5	JUL94	0
Pallaresa		161	U5	NOV93	U4	JUL94	-67
Pallaresa		246	U5	NOV93	U4	JUL94	-100
Pallaresa		171	U5	NOV93	U3	JUL94	-167
Pallaresa		308	U5	NOV93	U4	JUL94	-166
Pallaresa		203	U5	NOV93	U5	JUL94	0
Pallaresa		207	U5	NOV93	U5	JUL94	0
Pallaresa		178	U5	NOV93	U5	JUL94	-33
Pallaresa		211	U5	NOV93	U5	JUL94	-33
Pallaresa		187	U5	NOV93	U5	JUL94	0
Pallaresa		204	U5	NOV93	U4	JUL94	-100
Pallaresa		151	U5	NOV93	U5	JUL94	0
Pallaresa		151	U5	NOV93	U5	JUL94	0
Pallaresa		180	U6	NOV93	U6	JUL94	0
Pallaresa		201	U6	NOV93	U6	JUL94	0
Pallaresa	M	203	U6	NOV93	U6	JUL94	-33
Pallaresa		149	U6	NOV93	U6	JUL94	0
Pallaresa		200	U6	NOV93	U6	JUL94	0
Pallaresa		183	U6	NOV93	U6	JUL94	0
Pallaresa		190	U6	NOV93	U5	JUL94	-200
Pallaresa		183	U7	NOV93	U7	JUL94	0
Pallaresa		140	U7	NOV93	U7	JUL94	0
Pallaresa		139	U7	NOV93	U7	JUL94	0
Pallaresa		218	U7	NOV93	U7	JUL94	0
Pallaresa		192	U7	NOV93	U7	JUL94	-33
Pallaresa		223	U7	NOV93	U7	JUL94	0
Pallaresa		199	U7	NOV93	U7	JUL94	0
Pallaresa		249	U7	NOV93	U7	JUL94	0
Pallaresa		174	U7	NOV93	U7	JUL94	-33
Pallaresa		172	U7	NOV93	U7	JUL94	0
Pallaresa		165	U8	NOV93	U8	JUL94	0
Pallaresa		193	U8	NOV93	U8	JUL94	0
Pallaresa	M	194	U8	NOV93	U8	JUL94	0
Pallaresa	M	182	U8	NOV93	U8	JUL94	-30
Pallaresa	M	234	U8	NOV93	U8	JUL94	30
Pallaresa		213	U8	NOV93	U8	JUL94	-30
Pallaresa		153	U8	NOV93	U8	JUL94	0
Pallaresa	F	214	U8	NOV93	U8	JUL94	0
Pallaresa	F	207	U8	NOV93	U8	JUL94	0
Pallaresa		218	U8	NOV93	U8	JUL94	0
Pallaresa		232	U8	NOV93	U9	JUL94	160
Pallaresa		191	U8	NOV93	U8	JUL94	0
Pallaresa		208	U9	NOV93	U9	JUL94	33
Pallaresa	F	203	U9	NOV93	U9	JUL94	33
Pallaresa	M	234	U9	NOV93	U9	JUL94	-33
Pallaresa		222	U9	NOV93	U9	JUL94	0
Pallaresa		190	U9	NOV93	U9	JUL94	0
Pallaresa		227	U9	NOV93	U9	JUL94	33
Pallaresa		174	U9	NOV93	U9	JUL94	0
Pallaresa		163	U9	NOV93	U9	JUL94	0
Pallaresa		171	H2	JUL94	H2	NOV94	0
Pallaresa		299	H2	JUL94	H4	NOV94	50
Pallaresa		204	U4	JUL94	U4	NOV94	0
Pallaresa		200	U3	JUL94	U3	NOV94	0
Pallaresa		173	U3	JUL94	H11	NOV94	-311
Pallaresa		208	U5	JUL94	U4	NOV94	-34
Pallaresa		225	U4	JUL94	U4	NOV94	0
Pallaresa		314	U4	JUL94	U5	NOV94	166
Pallaresa		174	H2	JUL94	H2	NOV94	0
Pallaresa		214	U6	JUL94	U6	NOV94	66
Pallaresa		178	D4	JUL94	D4	NOV94	0
Pallaresa		210	H2	JUL94	H4	NOV94	50
Pallaresa		177	H3	JUL94	H4	NOV94	25
Pallaresa		161	H3	JUL94	H3	NOV94	0
Pallaresa		190	H1	JUL94	H1	NOV94	0
Pallaresa		168	H4	JUL94	H4	NOV94	0
Pallaresa		194	H5	JUL94	U4	NOV94	495
Pallaresa		217	H5	JUL94	H4	NOV94	-25
Pallaresa		170	H7	JUL94	H6	NOV94	-25
Pallaresa		189	H5	JUL94	H4	NOV94	-25
Pallaresa		172	H5	JUL94	H5	NOV94	0
Pallaresa		188	H4	JUL94	H8	NOV94	100
Pallaresa	M	182	H6	JUL94	H6	NOV94	0
Pallaresa		193	H7	JUL94	H8	NOV94	25
Pallaresa		162	H9	JUL94	H9	NOV94	0
Pallaresa		171	H8	JUL94	H8	NOV94	0
Pallaresa		182	H10	JUL94	H10	NOV94	0
Pallaresa		170	H9	JUL94	H9	NOV94	0
Pallaresa		216	H12	JUL94	H12	NOV94	0
Pallaresa		180	U1	JUL94	U1	NOV94	0
Pallaresa		182	U2	JUL94	U2	NOV94	0
Pallaresa		194	U2	JUL94	U2	NOV94	-33
Pallaresa		158	U4	JUL94	U4	NOV94	0
Pallaresa		170	U4	JUL94	U4	NOV94	0
Pallaresa		165	U4	JUL94	U4	NOV94	0
Pallaresa		181	U4	JUL94	U4	NOV94	33
Pallaresa		195	H7	JUL94	H11	NOV94	100
Pallaresa		176	U4	JUL94	U4	NOV94	0
Pallaresa		174	U4	JUL94	U4	NOV94	0
Pallaresa		193	U4	JUL94	U5	NOV94	34
Pallaresa		186	U4	JUL94	U4	NOV94	0
Pallaresa		172	U5	JUL94	U5	NOV94	0
Pallaresa		170	U4	JUL94	U4	NOV94	0
Pallaresa		162	U5	JUL94	U5	NOV94	-33
Pallaresa		185	U5	JUL94	U5	NOV94	0
Pallaresa		188	U5	JUL94	U5	NOV94	0
Pallaresa		202	U4	JUL94	U5	NOV94	67
Pallaresa		217	U5	JUL94	U5	NOV94	33
Pallaresa		214	U6	JUL94	U6	NOV94	33
Pallaresa		191	U5	JUL94	U5	NOV94	0
Pallaresa		183	U7	JUL94	U7	NOV94	0
Pallaresa		225	U7	JUL94	U7	NOV94	0
Pallaresa		164	U8	JUL94	U8	NOV94	0
Pallaresa		195	U8	JUL94	U8	NOV94	0
Pallaresa		170	U9	JUL94	U9	NOV94	0
Pallaresa		181	U9	JUL94	U9	NOV94	-33
Pallaresa		245	U10	JUL94	U10	NOV94	0
Pallaresa		195	U11	JUL94	U11	NOV94	0
Pallaresa		174	U12	JUL94	U15	NOV94	1525
Pallaresa		198	U12	JUL94	U12	NOV94	0
Pallaresa	F	176	U12	JUL94	U12	NOV94	0
Pallaresa		195	U12	JUL94	U12	NOV94	-40
Pallaresa	F	201	U12	JUL94	U12	NOV94	0
Pallaresa		199	U13	JUL94	U13	NOV94	-33
Pallaresa		210	U13	JUL94	U13	NOV94	-33
Pallaresa		175	U13	JUL94	U13	NOV94	0
Pallaresa		171	U14	JUL94	U14	NOV94	-40
Pallaresa	F	203	D1	JUL94	D1	NOV94	0
Pallaresa	M	160	D1	JUL94	D1	NOV94	0
Pallaresa		181	D5	JUL94	D5	NOV94	0
Pallaresa		182	D5	JUL94	D5	NOV94	-30
Pallaresa	F	209	D4	JUL94	H6	NOV94	380
Pallaresa		183	D4	JUL94	D5	NOV94	20
Pallaresa		228	U9	JUL94	U12	NOV94	909
Pallaresa		228	U9	JUL94	U9	NOV94	0
Pallaresa		240	U9	JUL94	U8	NOV94	-160
Pallaresa		230	U9	JUL94	U9	NOV94	0
Pallaresa		222	U10	JUL94	U10	NOV94	0
Pallaresa		205	U9	JUL94	U9	NOV94	-33
Pallaresa	M	248	U10	JUL94	U10	NOV94	0
Pallaresa		228	U10	JUL94	U10	NOV94	60
Pallaresa		200	U10	JUL94	U10	NOV94	0
Pallaresa	M	148	U11	JUL94	U11	NOV94	0
Pallaresa		215	U11	JUL94	U11	NOV94	0
Pallaresa		181	U11	JUL94	U11	NOV94	0
Pallaresa		213	U11	JUL94	U11	NOV94	0
Pallaresa		230	U11	JUL94	U11	NOV94	25
Pallaresa	M	182	U12	JUL94	U12	NOV94	0
Pallaresa	M	190	U12	JUL94	U12	NOV94	-40
Pallaresa		216	U12	JUL94	U12	NOV94	0
Pallaresa		225	U12	JUL94	U12	NOV94	-40
Pallaresa		213	U13	JUL94	U13	NOV94	0
Pallaresa		204	U15	JUL94	U15	NOV94	0
Pallaresa		200	D2	JUL94	D2	NOV94	0
Pallaresa		198	H5	JUL94	H6	NOV94	25
Pallaresa		199	H7	JUL94	H7	NOV94	0
Pallaresa		175	U2	JUL94	H9	NOV94	-261
Pallaresa		191	H9	JUL94	H9	NOV94	0
Pallaresa	F	188	H12	JUL94	H12	NOV94	0
Pallaresa		186	U1	JUL94	U1	NOV94	30
Pallaresa		194	U1	JUL94	U1	NOV94	0
Pallaresa		194	U1	JUL94	U1	NOV94	0
Pallaresa		188	U2	JUL94	U1	NOV94	-101
Pallaresa		166	U3	JUL94	U2	NOV94	-34
Pallaresa		167	U3	JUL94	U3	NOV94	0
Pallaresa		247	U4	JUL94	U4	NOV94	0
Pallaresa		191	U5	JUL94	U5	NOV94	0
Pallaresa		167	U5	JUL94	U5	NOV94	0
Pallaresa		172	U6	JUL94	U6	NOV94	-33
Pallaresa		236	U9	JUL94	U8	NOV94	-160
Pallaresa		237	U11	JUL94	U11	NOV94	0
Pallaresa		172	U11	JUL94	U11	NOV94	0
Pallaresa		212	U11	JUL94	U11	NOV94	0
Pallaresa		195	U12	JUL94	U12	NOV94	0
Pallaresa		177	U14	JUL94	U14	NOV94	0
Pallaresa		202	D4	JUL94	D4	NOV94	-25
Pallaresa		205	H6	JUL94	H6	NOV94	0
Pallaresa		165	D5	JUL94	D5	NOV94	0
Pallaresa		189	D6	JUL94	D5	NOV94	-95
Pallaresa		189	D6	JUL94	D6	NOV94	0
Pallaresa		225	D6	JUL94	D5	NOV94	-35
Pallaresa		181	D6	JUL94	H2	NOV94	115
Pallaresa		210	D6	JUL94	D6	NOV94	-30
Pallaresa		215	D6	JUL94	D6	NOV94	0
Pallaresa		170	D3	JUL94	D3	NOV94	0
Pallaresa		170	D3	JUL94	D3	NOV94	0
Pallaresa		170	D3	JUL94	D3	NOV94	0
Pallaresa		158	D3	JUL94	D3	NOV94	0
Pallaresa		162	D3	JUL94	D3	NOV94	0
Pallaresa		150	D3	JUL94	D3	NOV94	0
Pallaresa		152	D3	JUL94	D3	NOV94	0
Pallaresa		171	D3	JUL94	D3	NOV94	0
Pallaresa		175	D3	JUL94	D3	NOV94	-33
Pallaresa		172	D3	JUL94	D3	NOV94	0
Pallaresa		184	H3	JUL94	H4	NOV94	25
Pallaresa		191	H4	JUL94	H4	NOV94	0
Pallaresa		146	H7	JUL94	H7	NOV94	0
Pallaresa		151	H8	JUL94	H8	NOV94	0
Pallaresa		155	H10	JUL94	H9	NOV94	-25
Pallaresa		161	U1	JUL94	U1	NOV94	0
Pallaresa		176	U1	JUL94	U1	NOV94	0
Pallaresa		188	U1	JUL94	H12	NOV94	-25
Pallaresa		180	U1	JUL94	U1	NOV94	30
Pallaresa		178	U1	JUL94	H12	NOV94	-25
Pallaresa		184	U1	JUL94	U1	NOV94	0
Pallaresa		200	U1	JUL94	U4	NOV94	361
Pallaresa		161	U1	JUL94	U1	NOV94	0
Pallaresa	M	169	U1	JUL94	U1	NOV94	0
Pallaresa		147	U2	JUL94	U2	NOV94	0
Pallaresa		192	U7	JUL94	U7	NOV94	-33
Pallaresa		215	U7	JUL94	U7	NOV94	0
Pallaresa		202	U9	JUL94	U13	NOV94	1455
Pallaresa		201	U9	JUL94	U9	NOV94	0
Pallaresa		220	U9	JUL94	U9	NOV94	-33
Pallaresa		213	U9	JUL94	U9	NOV94	-33
Pallaresa		182	U10	JUL94	U10	NOV94	0
Pallaresa		196	U10	JUL94	U10	NOV94	0
Pallaresa		158	U11	JUL94	U7	NOV94	-881
Pallaresa	M	168	U11	JUL94	U11	NOV94	0
Pallaresa		155	U12	JUL94	U12	NOV94	0
Pallaresa	M	159	U12	JUL94	U12	NOV94	0
Pallaresa		170	U12	JUL94	U12	NOV94	0
Pallaresa		194	U12	JUL94	U12	NOV94	0
Pallaresa	M	160	U13	JUL94	U13	NOV94	0
Pallaresa		225	U13	JUL94	U13	NOV94	0
Pallaresa		228	U15	JUL94	U15	NOV94	35
Pallaresa	F	156	U15	JUL94	U15	NOV94	-35
Pallaresa		203	U15	JUL94	U15	NOV94	0
Pallaresa		168	U2	JUL94	U3	NOV94	100
Pallaresa	M	144	U2	JUL94	U3	NOV94	67
Pallaresa		190	U2	JUL94	U3	NOV94	34
Pallaresa		213	U2	JUL94	U2	NOV94	-33
Pallaresa		162	U3	JUL94	U4	NOV94	133
Pallaresa		176	U3	JUL94	U3	NOV94	33
Pallaresa		194	U4	JUL94	U3	NOV94	-34
Pallaresa		195	U4	JUL94	U4	NOV94	0
Pallaresa	F	192	U5	JUL94	U5	NOV94	0
Pallaresa		207	U5	JUL94	U5	NOV94	0
Vallferrera		189	B3	MAR93	B3	JUL93	0
Vallferrera	F	188	B3	MAR93	B2	JUL93	166
Vallferrera		184	B3	MAR93	B3	JUL93	0
Vallferrera		225	B3	MAR93	B3	JUL93	0
Vallferrera		201	B3	MAR93	B3	JUL93	0
Vallferrera		155	B3	MAR93	B3	JUL93	33
Vallferrera		178	B3	MAR93	B3	JUL93	33
Vallferrera	F	191	B3	MAR93	B3	JUL93	0
Vallferrera		218	B3	MAR93	B3	JUL93	0
Vallferrera	F	223	B3	MAR93	B3	JUL93	33
Vallferrera		173	B3	MAR93	B3	JUL93	0
Vallferrera		182	B3	MAR93	B2	JUL93	34
Vallferrera		213	B3	MAR93	B2	JUL93	100
Vallferrera		212	B3	MAR93	B3	JUL93	0
Vallferrera		195	B3	MAR93	B3	JUL93	0
Vallferrera		219	B3	MAR93	B2	JUL93	34
Vallferrera	M	219	B3	MAR93	B2	JUL93	133
Vallferrera	M	178	B3	MAR93	B3	JUL93	33
Vallferrera		209	B3	MAR93	B3	JUL93	0
Vallferrera		187	B3	MAR93	B3	JUL93	0
Vallferrera		188	B3	MAR93	B3	JUL93	-33
Vallferrera		208	B3	MAR93	B3	JUL93	33
Vallferrera		239	B3	MAR93	B3	JUL93	0
Vallferrera		244	B3	MAR93	B3	JUL93	0
Vallferrera		183	B2	MAR93	B2	JUL93	33
Vallferrera	F	210	B2	MAR93	B2	JUL93	0
Vallferrera		253	B2	MAR93	B2	JUL93	0
Vallferrera	M	230	B2	MAR93	A4	JUL93	833
Vallferrera		234	B2	MAR93	C7	JUL93	350
Vallferrera		153	B2	MAR93	B2	JUL93	33
Vallferrera		166	B2	MAR93	B2	JUL93	0
Vallferrera		207	B2	MAR93	B2	JUL93	33
Vallferrera	F	193	B2	MAR93	B2	JUL93	0
Vallferrera		240	B2	MAR93	B2	JUL93	0
Vallferrera		252	B2	MAR93	B2	JUL93	0
Vallferrera		192	B2	MAR93	B2	JUL93	0
Vallferrera		230	B2	MAR93	B2	JUL93	0
Vallferrera		256	B2	MAR93	B2	JUL93	0
Vallferrera		172	B2	MAR93	B2	JUL93	0
Vallferrera		192	B2	MAR93	B3	JUL93	-100
Vallferrera		170	B2	MAR93	B2	JUL93	-33
Vallferrera	F	183	B2	MAR93	B2	JUL93	0
Vallferrera		203	B2	MAR93	B2	JUL93	-33
Vallferrera		228	B2	MAR93	B2	JUL93	0
Vallferrera	F	248	B2	MAR93	B2	JUL93	0
Vallferrera		206	B2	MAR93	B1	JUL93	100
Vallferrera		175	B2	MAR93	B2	JUL93	-33
Vallferrera		183	B2	MAR93	B2	JUL93	-33
Vallferrera	M	195	B2	MAR93	C9	JUL93	334
Vallferrera		250	B2	MAR93	B2	JUL93	0
Vallferrera	F	203	B1	MAR93	B1	JUL93	0
Vallferrera	F	198	B1	MAR93	B1	JUL93	0
Vallferrera		143	B1	MAR93	B1	JUL93	0
Vallferrera		197	B1	MAR93	B1	JUL93	0
Vallferrera		166	B1	MAR93	B1	JUL93	33
Vallferrera	M	163	B1	MAR93	B1	JUL93	0
Vallferrera		181	B1	MAR93	B1	JUL93	0
Vallferrera		187	B1	MAR93	B1	JUL93	0
Vallferrera	M	212	B1	MAR93	B1	JUL93	0
Vallferrera		214	B1	MAR93	B1	JUL93	0
Vallferrera		165	B1	MAR93	B1	JUL93	0
Vallferrera	F	177	B1	MAR93	B1	JUL93	0
Vallferrera	F	184	B1	MAR93	C5	JUL93	134
Vallferrera	F	184	B1	MAR93	B1	JUL93	-33
Vallferrera		220	B1	MAR93	A5	JUL93	767
Vallferrera		203	B1	MAR93	B1	JUL93	0
Vallferrera	M	231	B1	MAR93	C1	JUL93	34
Vallferrera	M	213	B1	MAR93	B1	JUL93	-33
Vallferrera		239	B1	MAR93	B1	JUL93	-33
Vallferrera	M	216	B1	MAR93	C1	JUL93	34
Vallferrera	M	212	B1	MAR93	B1	JUL93	-33
Vallferrera		152	B1	MAR93	B1	JUL93	66
Vallferrera	F	198	B1	MAR93	B1	JUL93	0
Vallferrera		201	B1	MAR93	C6	JUL93	159
Vallferrera		196	B1	MAR93	B1	JUL93	33
Vallferrera		198	B1	MAR93	B1	JUL93	0
Vallferrera	M	151	C1	MAR93	A2	JUL93	433
Vallferrera		164	C1	MAR93	C2	JUL93	25
Vallferrera	F	177	C1	MAR93	C1	JUL93	0
Vallferrera		190	C1	MAR93	C1	JUL93	0
Vallferrera		200	C1	MAR93	C1	JUL93	0
Vallferrera		213	C1	MAR93	C1	JUL93	0
Vallferrera	F	244	C1	MAR93	C2	JUL93	25
Vallferrera	F	257	C1	MAR93	C1	JUL93	0
Vallferrera		161	C2	MAR93	C3	JUL93	25
Vallferrera		170	C2	MAR93	C2	JUL93	0
Vallferrera	M	198	C2	MAR93	C2	JUL93	0
Vallferrera		164	C2	MAR93	C4	JUL93	50
Vallferrera		178	C3	MAR93	C3	JUL93	0
Vallferrera		175	C3	MAR93	C2	JUL93	-25
Vallferrera		203	C3	MAR93	C4	JUL93	25
Vallferrera		178	C1	MAR93	C1	JUL93	0
Vallferrera		183	C1	MAR93	C1	JUL93	0
Vallferrera		229	C1	MAR93	C1	JUL93	0
Vallferrera		158	C2	MAR93	C2	JUL93	0
Vallferrera		201	C2	MAR93	C11	JUL93	225
Vallferrera	M	183	C3	MAR93	B2	JUL93	-184
Vallferrera	F	223	C1	MAR93	C2	JUL93	25
Vallferrera	F	239	C1	MAR93	C1	JUL93	0
Vallferrera		178	C2	MAR93	C4	JUL93	50
Vallferrera	M	160	C3	MAR93	C4	JUL93	25
Vallferrera		164	C4	MAR93	C4	JUL93	0
Vallferrera		182	C4	MAR93	C5	JUL93	25
Vallferrera		181	C4	MAR93	C4	JUL93	0
Vallferrera		205	C4	MAR93	C4	JUL93	0
Vallferrera	F	224	C4	MAR93	C4	JUL93	0
Vallferrera		213	C4	MAR93	C4	JUL93	0
Vallferrera		225	C4	MAR93	C4	JUL93	0
Vallferrera		242	C4	MAR93	C4	JUL93	0
Vallferrera	F	160	C5	MAR93	C6	JUL93	25
Vallferrera		218	C5	MAR93	C5	JUL93	0
Vallferrera	M	241	C5	MAR93	C5	JUL93	0
Vallferrera		147	C6	MAR93	C5	JUL93	-25
Vallferrera	F	176	C6	MAR93	C6	JUL93	0
Vallferrera		226	C6	MAR93	C6	JUL93	0
Vallferrera	M	233	C6	MAR93	C6	JUL93	0
Vallferrera		246	C6	MAR93	A1	JUL93	175
Vallferrera		223	C6	MAR93	C6	JUL93	0
Vallferrera		233	C6	MAR93	C7	JUL93	25
Vallferrera	M	204	C5	MAR93	C5	JUL93	0
Vallferrera		202	C6	MAR93	C6	JUL93	0
Vallferrera		189	C6	MAR93	C6	JUL93	0
Vallferrera		199	C6	MAR93	C6	JUL93	0
Vallferrera		222	C6	MAR93	C6	JUL93	0
Vallferrera	F	228	C6	MAR93	C6	JUL93	0
Vallferrera		237	C6	MAR93	C5	JUL93	-25
Vallferrera		228	C6	MAR93	C6	JUL93	0
Vallferrera		162	C4	MAR93	C4	JUL93	0
Vallferrera		206	C4	MAR93	C4	JUL93	0
Vallferrera		218	C4	MAR93	C4	JUL93	0
Vallferrera		143	C5	MAR93	C7	JUL93	50
Vallferrera	M	160	C5	MAR93	C9	JUL93	100
Vallferrera	F	203	C5	MAR93	C6	JUL93	25
Vallferrera		170	C5	MAR93	C5	JUL93	0
Vallferrera		201	C7	MAR93	C7	JUL93	0
Vallferrera	M	192	C7	MAR93	C7	JUL93	0
Vallferrera		206	C7	MAR93	C7	JUL93	0
Vallferrera		203	C7	MAR93	C7	JUL93	0
Vallferrera	F	240	C7	MAR93	C7	JUL93	0
Vallferrera		160	C8	MAR93	C8	JUL93	0
Vallferrera		203	C8	MAR93	C7	JUL93	-25
Vallferrera		157	C8	MAR93	C8	JUL93	0
Vallferrera	F	200	C8	MAR93	C8	JUL93	0
Vallferrera		180	C8	MAR93	C8	JUL93	0
Vallferrera	F	217	C8	MAR93	C8	JUL93	0
Vallferrera		247	C8	MAR93	C8	JUL93	0
Vallferrera		211	C8	MAR93	C9	JUL93	25
Vallferrera		166	C9	MAR93	C9	JUL93	0
Vallferrera		177	C9	MAR93	C9	JUL93	0
Vallferrera		161	C9	MAR93	C4	JUL93	-125
Vallferrera		211	C9	MAR93	C9	JUL93	0
Vallferrera	F	170	C9	MAR93	C9	JUL93	0
Vallferrera		202	C9	MAR93	C9	JUL93	0
Vallferrera	M	206	C9	MAR93	C9	JUL93	0
Vallferrera		202	C9	MAR93	C9	JUL93	0
Vallferrera		253	C7	MAR93	C7	JUL93	0
Vallferrera		202	C8	MAR93	C8	JUL93	0
Vallferrera	F	150	C9	MAR93	C9	JUL93	0
Vallferrera		167	C9	MAR93	C9	JUL93	0
Vallferrera		201	C9	MAR93	A1	JUL93	166
Vallferrera		196	C9	MAR93	C9	JUL93	0
Vallferrera		185	C9	MAR93	C9	JUL93	0
Vallferrera	F	230	C9	MAR93	C10	JUL93	25
Vallferrera		153	C9	MAR93	C9	JUL93	0
Vallferrera		154	C10	MAR93	C10	JUL93	0
Vallferrera		147	C10	MAR93	C10	JUL93	0
Vallferrera		197	C10	MAR93	C10	JUL93	0
Vallferrera		203	C11	MAR93	C11	JUL93	0
Vallferrera		193	C11	MAR93	C10	JUL93	-25
Vallferrera	F	185	C11	MAR93	C11	JUL93	0
Vallferrera	F	197	C11	MAR93	A3	JUL93	250
Vallferrera	F	221	C11	MAR93	C12	JUL93	25
Vallferrera		221	C11	MAR93	C11	JUL93	0
Vallferrera		226	C11	MAR93	C6	JUL93	-125
Vallferrera	F	213	C11	MAR93	C11	JUL93	0
Vallferrera		155	C12	MAR93	C12	JUL93	0
Vallferrera		160	C12	MAR93	C12	JUL93	0
Vallferrera		203	C12	MAR93	C12	JUL93	0
Vallferrera		194	C12	MAR93	C12	JUL93	0
Vallferrera	M	190	C12	MAR93	C12	JUL93	0
Vallferrera	M	247	C12	MAR93	C12	JUL93	0
Vallferrera		156	C10	MAR93	C11	JUL93	25
Vallferrera		197	C10	MAR93	C9	JUL93	-25
Vallferrera		262	C10	MAR93	C11	JUL93	25
Vallferrera	F	253	C10	MAR93	C10	JUL93	0
Vallferrera		248	C10	MAR93	C10	JUL93	0
Vallferrera		187	C11	MAR93	A1	JUL93	50
Vallferrera	F	203	C12	MAR93	C11	JUL93	-25
Vallferrera		231	C12	MAR93	C11	JUL93	-25
Vallferrera		146	C11	MAR93	C9	JUL93	-50
Vallferrera		217	C11	MAR93	C10	JUL93	-25
Vallferrera		169	A1	MAR93	A4	JUL93	300
Vallferrera	M	192	A1	MAR93	A1	JUL93	0
Vallferrera	M	151	A1	MAR93	A1	JUL93	0
Vallferrera		183	A1	MAR93	A1	JUL93	0
Vallferrera		174	A1	MAR93	A1	JUL93	0
Vallferrera		195	A1	MAR93	A1	JUL93	0
Vallferrera		215	A1	MAR93	A1	JUL93	0
Vallferrera		200	A1	MAR93	A1	JUL93	0
Vallferrera		223	A1	MAR93	C12	JUL93	-25
Vallferrera		208	A1	MAR93	A1	JUL93	0
Vallferrera		244	A1	MAR93	C12	JUL93	-25
Vallferrera		160	A1	MAR93	A1	JUL93	33
Vallferrera	M	197	A1	MAR93	A1	JUL93	0
Vallferrera		200	A1	MAR93	A1	JUL93	0
Vallferrera	M	178	A1	MAR93	A1	JUL93	0
Vallferrera		210	A1	MAR93	A1	JUL93	0
Vallferrera		212	A1	MAR93	A1	JUL93	-33
Vallferrera		205	A1	MAR93	A1	JUL93	0
Vallferrera	F	235	A1	MAR93	A1	JUL93	-33
Vallferrera		244	A1	MAR93	A1	JUL93	0
Vallferrera		198	A1	MAR93	A1	JUL93	0
Vallferrera		180	A1	MAR93	A2	JUL93	34
Vallferrera		160	A1	MAR93	A3	JUL93	134
Vallferrera		248	A1	MAR93	A1	JUL93	-66
Vallferrera	F	205	A1	MAR93	A1	JUL93	0
Vallferrera		210	A1	MAR93	A1	JUL93	0
Vallferrera		274	A1	MAR93	A1	JUL93	0
Vallferrera		288	A1	MAR93	A1	JUL93	0
Vallferrera		177	A1	MAR93	A1	JUL93	0
Vallferrera		162	A1	MAR93	A1	JUL93	0
Vallferrera	F	208	A1	MAR93	A1	JUL93	0
Vallferrera		226	A1	MAR93	A1	JUL93	0
Vallferrera	F	225	A1	MAR93	A1	JUL93	0
Vallferrera		230	A1	MAR93	A1	JUL93	-33
Vallferrera		151	A1	MAR93	A1	JUL93	0
Vallferrera		189	A1	MAR93	C12	JUL93	-25
Vallferrera		177	A1	MAR93	C10	JUL93	-75
Vallferrera	F	234	A1	MAR93	C12	JUL93	-25
Vallferrera	M	284	A1	MAR93	C12	JUL93	-25
Vallferrera		143	A1	MAR93	A1	JUL93	0
Vallferrera		198	A1	MAR93	C11	JUL93	-83
Vallferrera		231	A1	MAR93	A1	JUL93	0
Vallferrera		262	A1	MAR93	A1	JUL93	33
Vallferrera		220	A1	MAR93	A2	JUL93	34
Vallferrera		188	A1	MAR93	A1	JUL93	0
Vallferrera		183	A1	MAR93	A1	JUL93	0
Vallferrera		225	A1	MAR93	A1	JUL93	0
Vallferrera		230	A1	MAR93	A1	JUL93	0
Vallferrera	M	250	A1	MAR93	A1	JUL93	0
Vallferrera	M	156	A1	MAR93	A1	JUL93	0
Vallferrera	M	178	A1	MAR93	A1	JUL93	0
Vallferrera	M	171	A1	MAR93	C12	JUL93	-58
Vallferrera		223	A1	MAR93	A1	JUL93	0
Vallferrera		236	A1	MAR93	A1	JUL93	-33
Vallferrera		242	A1	MAR93	A1	JUL93	0
Vallferrera		168	A2	MAR93	A2	JUL93	33
Vallferrera		158	A2	MAR93	A2	JUL93	0
Vallferrera		163	A2	MAR93	A5	JUL93	300
Vallferrera	F	193	A2	MAR93	A2	JUL93	33
Vallferrera		229	A2	MAR93	A2	JUL93	0
Vallferrera		248	A2	MAR93	A2	JUL93	0
Vallferrera		223	A2	MAR93	A2	JUL93	0
Vallferrera		270	A2	MAR93	A2	JUL93	33
Vallferrera		257	A2	MAR93	A2	JUL93	0
Vallferrera		216	A2	MAR93	A2	JUL93	0
Vallferrera		224	A2	MAR93	A1	JUL93	-34
Vallferrera		270	A2	MAR93	A2	JUL93	0
Vallferrera		188	A2	MAR93	A2	JUL93	0
Vallferrera	F	197	A2	MAR93	A2	JUL93	-33
Vallferrera		204	A2	MAR93	A2	JUL93	-33
Vallferrera		222	A2	MAR93	A2	JUL93	0
Vallferrera		225	A2	MAR93	A2	JUL93	-33
Vallferrera	M	213	A2	MAR93	A2	JUL93	33
Vallferrera	M	272	A2	MAR93	A2	JUL93	33
Vallferrera		198	A2	MAR93	A2	JUL93	0
Vallferrera		191	A2	MAR93	A2	JUL93	33
Vallferrera	F	245	A2	MAR93	A2	JUL93	0
Vallferrera		243	A2	MAR93	A2	JUL93	0
Vallferrera		268	A2	MAR93	A2	JUL93	-33
Vallferrera		213	A2	MAR93	A3	JUL93	34
Vallferrera	M	208	A2	MAR93	A3	JUL93	34
Vallferrera	M	188	A2	MAR93	C2	JUL93	-441
Vallferrera		188	A2	MAR93	A3	JUL93	34
Vallferrera	F	221	A2	MAR93	A3	JUL93	34
Vallferrera		234	A2	MAR93	A3	JUL93	34
Vallferrera		230	A2	MAR93	A3	JUL93	34
Vallferrera		220	A2	MAR93	A2	JUL93	0
Vallferrera		193	A2	MAR93	A3	JUL93	100
Vallferrera		163	A2	MAR93	A3	JUL93	34
Vallferrera	M	161	A2	MAR93	A3	JUL93	34
Vallferrera		157	A2	MAR93	A2	JUL93	0
Vallferrera		196	A2	MAR93	A3	JUL93	34
Vallferrera		211	A2	MAR93	A3	JUL93	34
Vallferrera		231	A2	MAR93	A3	JUL93	34
Vallferrera		230	A2	MAR93	A3	JUL93	34
Vallferrera	M	241	A2	MAR93	A3	JUL93	34
Vallferrera		160	A2	MAR93	A2	JUL93	33
Vallferrera		177	A2	MAR93	A2	JUL93	0
Vallferrera	M	185	A2	MAR93	A2	JUL93	0
Vallferrera		151	A2	MAR93	A2	JUL93	66
Vallferrera		200	A2	MAR93	A2	JUL93	0
Vallferrera		214	A2	MAR93	A2	JUL93	0
Vallferrera	M	238	A2	MAR93	A5	JUL93	366
Vallferrera	M	223	A2	MAR93	A2	JUL93	0
Vallferrera		238	A2	MAR93	A2	JUL93	0
Vallferrera	M	251	A2	MAR93	A2	JUL93	33
Vallferrera		179	A2	MAR93	A2	JUL93	33
Vallferrera		197	A2	MAR93	A2	JUL93	33
Vallferrera		217	A2	MAR93	A2	JUL93	0
Vallferrera	M	208	A2	MAR93	A3	JUL93	34
Vallferrera	M	243	A2	MAR93	A3	JUL93	34
Vallferrera	M	236	A2	MAR93	A3	JUL93	34
Vallferrera		276	A2	MAR93	A3	JUL93	34
Vallferrera		190	A2	MAR93	A2	JUL93	0
Vallferrera		175	A2	MAR93	A3	JUL93	67
Vallferrera	M	238	A2	MAR93	A2	JUL93	-33
Vallferrera		248	A2	MAR93	A2	JUL93	0
Vallferrera		187	A3	MAR93	A3	JUL93	0
Vallferrera		180	A3	MAR93	A3	JUL93	0
Vallferrera		215	A3	MAR93	A3	JUL93	0
Vallferrera	F	251	A3	MAR93	A3	JUL93	0
Vallferrera		249	A3	MAR93	A3	JUL93	0
Vallferrera	F	222	A3	MAR93	A3	JUL93	0
Vallferrera		246	A3	MAR93	A3	JUL93	0
Vallferrera		224	A3	MAR93	A3	JUL93	0
Vallferrera		174	A3	MAR93	A3	JUL93	0
Vallferrera		165	A3	MAR93	A3	JUL93	0
Vallferrera	F	174	A3	MAR93	A3	JUL93	0
Vallferrera		178	A3	MAR93	A3	JUL93	-33
Vallferrera		192	A3	MAR93	A3	JUL93	0
Vallferrera		165	A3	MAR93	A3	JUL93	0
Vallferrera		190	A3	MAR93	A3	JUL93	-33
Vallferrera	F	236	A3	MAR93	A3	JUL93	0
Vallferrera		209	A3	MAR93	A3	JUL93	-33
Vallferrera		223	A3	MAR93	A3	JUL93	-33
Vallferrera		281	A3	MAR93	A4	JUL93	67
Vallferrera		221	A2	MAR93	A4	JUL93	167
Vallferrera	F	218	A2	MAR93	A3	JUL93	34
Vallferrera		242	A2	MAR93	A2	JUL93	0
Vallferrera		172	A3	MAR93	A3	JUL93	0
Vallferrera		180	A3	MAR93	A3	JUL93	0
Vallferrera		192	A3	MAR93	A3	JUL93	0
Vallferrera		158	A3	MAR93	A3	JUL93	0
Vallferrera		194	A3	MAR93	A3	JUL93	0
Vallferrera		188	A3	MAR93	A3	JUL93	0
Vallferrera	F	210	A3	MAR93	A3	JUL93	0
Vallferrera		233	A3	MAR93	A4	JUL93	133
Vallferrera		233	A3	MAR93	A3	JUL93	0
Vallferrera		190	A3	MAR93	A3	JUL93	0
Vallferrera		232	A3	MAR93	A3	JUL93	0
Vallferrera		238	A3	MAR93	A3	JUL93	0
Vallferrera	M	201	A3	MAR93	A3	JUL93	0
Vallferrera		258	A3	MAR93	A3	JUL93	0
Vallferrera		264	A3	MAR93	A3	JUL93	0
Vallferrera		291	A3	MAR93	A3	JUL93	0
Vallferrera		157	A3	MAR93	A3	JUL93	33
Vallferrera	M	302	A3	MAR93	A3	JUL93	0
Vallferrera		160	A3	MAR93	A3	JUL93	0
Vallferrera		156	A3	MAR93	A3	JUL93	0
Vallferrera	F	160	A3	MAR93	A3	JUL93	-33
Vallferrera		180	A3	MAR93	A3	JUL93	0
Vallferrera		200	A3	MAR93	A3	JUL93	0
Vallferrera	F	208	A3	MAR93	A3	JUL93	-33
Vallferrera	F	161	A3	MAR93	A3	JUL93	0
Vallferrera		175	A3	MAR93	A3	JUL93	-33
Vallferrera	M	202	A3	MAR93	A3	JUL93	0
Vallferrera		162	A3	MAR93	A3	JUL93	0
Vallferrera	M	168	A3	MAR93	A4	JUL93	133
Vallferrera	F	232	A3	MAR93	A3	JUL93	-33
Vallferrera		208	A3	MAR93	A3	JUL93	0
Vallferrera	M	223	A3	MAR93	A4	JUL93	67
Vallferrera		235	A3	MAR93	A3	JUL93	33
Vallferrera	F	237	A3	MAR93	A2	JUL93	-67
Vallferrera		234	A3	MAR93	A3	JUL93	-33
Vallferrera		207	A3	MAR93	A3	JUL93	0
Vallferrera		203	A3	MAR93	A3	JUL93	0
Vallferrera	F	206	A3	MAR93	A3	JUL93	0
Vallferrera		258	A3	MAR93	A3	JUL93	0
Vallferrera		249	A3	MAR93	A3	JUL93	0
Vallferrera		280	A3	MAR93	A4	JUL93	34
Vallferrera		227	A3	MAR93	A4	JUL93	34
Vallferrera	F	258	A3	MAR93	A3	JUL93	0
Vallferrera	M	262	A3	MAR93	A3	JUL93	0
Vallferrera	F	272	A3	MAR93	A3	JUL93	0
Vallferrera		170	A3	MAR93	A3	JUL93	0
Vallferrera		172	A3	MAR93	A4	JUL93	34
Vallferrera		205	A3	MAR93	A3	JUL93	-33
Vallferrera	M	208	A3	MAR93	A3	JUL93	0
Vallferrera		200	A3	MAR93	A3	JUL93	0
Vallferrera		155	A3	MAR93	A3	JUL93	0
Vallferrera		240	A3	MAR93	A3	JUL93	-33
Vallferrera	F	237	A3	MAR93	A3	JUL93	0
Vallferrera		226	A3	MAR93	A3	JUL93	0
Vallferrera		230	A3	MAR93	A3	JUL93	0
Vallferrera		251	A3	MAR93	A3	JUL93	0
Vallferrera		170	A3	MAR93	A2	JUL93	-166
Vallferrera		181	A3	MAR93	A3	JUL93	0
Vallferrera	F	192	A3	MAR93	A4	JUL93	34
Vallferrera		253	A3	MAR93	A3	JUL93	0
Vallferrera		181	A3	MAR93	A1	JUL93	-200
Vallferrera		193	A3	MAR93	A4	JUL93	34
Vallferrera		243	A3	MAR93	A3	JUL93	0
Vallferrera		247	A3	MAR93	A4	JUL93	34
Vallferrera		245	A3	MAR93	A3	JUL93	0
Vallferrera		230	A3	MAR93	A3	JUL93	0
Vallferrera	F	224	A3	MAR93	A3	JUL93	0
Vallferrera		228	A3	MAR93	A2	JUL93	-133
Vallferrera		227	A3	MAR93	A3	JUL93	0
Vallferrera	F	191	A3	MAR93	A3	JUL93	0
Vallferrera		197	A3	MAR93	A3	JUL93	0
Vallferrera		159	A3	MAR93	A3	JUL93	0
Vallferrera	F	152	A3	MAR93	A3	JUL93	0
Vallferrera		160	A3	MAR93	A3	JUL93	66
Vallferrera		188	A3	MAR93	A3	JUL93	0
Vallferrera		154	A3	MAR93	A2	JUL93	-34
Vallferrera		203	A3	MAR93	A3	JUL93	0
Vallferrera		232	A3	MAR93	A3	JUL93	0
Vallferrera	F	243	A3	MAR93	A3	JUL93	0
Vallferrera	M	228	A3	MAR93	A3	JUL93	0
Vallferrera		149	A3	MAR93	A3	JUL93	0
Vallferrera		172	A3	MAR93	A3	JUL93	0
Vallferrera		168	A3	MAR93	A3	JUL93	0
Vallferrera	F	258	A3	MAR93	A3	JUL93	-33
Vallferrera		160	A3	MAR93	A3	JUL93	0
Vallferrera		202	A3	MAR93	A4	JUL93	34
Vallferrera	M	234	A3	MAR93	A3	JUL93	0
Vallferrera		211	A3	MAR93	A3	JUL93	-33
Vallferrera		232	A3	MAR93	A3	JUL93	0
Vallferrera		284	A3	MAR93	A3	JUL93	0
Vallferrera	F	156	A3	MAR93	A3	JUL93	0
Vallferrera		180	A3	MAR93	A4	JUL93	166
Vallferrera		190	A3	MAR93	A3	JUL93	0
Vallferrera	F	209	A3	MAR93	A3	JUL93	0
Vallferrera		228	A3	MAR93	A3	JUL93	0
Vallferrera		151	A3	MAR93	A3	JUL93	33
Vallferrera		178	A3	MAR93	A3	JUL93	0
Vallferrera		167	A3	MAR93	A3	JUL93	0
Vallferrera	F	172	A3	MAR93	A3	JUL93	-33
Vallferrera	F	202	A3	MAR93	A3	JUL93	0
Vallferrera	F	204	A3	MAR93	A3	JUL93	0
Vallferrera	F	230	A3	MAR93	A3	JUL93	-33
Vallferrera		231	A3	MAR93	A3	JUL93	-66
Vallferrera		291	A3	MAR93	A4	JUL93	34
Vallferrera	M	164	A4	MAR93	A4	JUL93	0
Vallferrera		169	A4	MAR93	A5	JUL93	100
Vallferrera		156	A4	MAR93	A5	JUL93	166
Vallferrera	M	178	A4	MAR93	A5	JUL93	166
Vallferrera		202	A4	MAR93	A4	JUL93	33
Vallferrera	F	180	A4	MAR93	A4	JUL93	0
Vallferrera	F	198	A4	MAR93	A4	JUL93	0
Vallferrera		221	A4	MAR93	A4	JUL93	33
Vallferrera		185	A4	MAR93	A5	JUL93	100
Vallferrera		248	A4	MAR93	A4	JUL93	33
Vallferrera		168	A4	MAR93	A4	JUL93	0
Vallferrera	F	168	A4	MAR93	A4	JUL93	33
Vallferrera	F	193	A4	MAR93	A4	JUL93	33
Vallferrera		158	A4	MAR93	A5	JUL93	166
Vallferrera		177	A4	MAR93	A4	JUL93	0
Vallferrera		187	A4	MAR93	A5	JUL93	166
Vallferrera	M	192	A4	MAR93	A4	JUL93	33
Vallferrera	F	233	A4	MAR93	A4	JUL93	33
Vallferrera		242	A4	MAR93	A2	JUL93	-134
Vallferrera		238	A4	MAR93	A4	JUL93	0
Vallferrera		186	A4	MAR93	A4	JUL93	33
Vallferrera		197	A4	MAR93	A4	JUL93	33
Vallferrera	M	181	A4	MAR93	A4	JUL93	33
Vallferrera		207	A4	MAR93	A4	JUL93	0
Vallferrera		212	A4	MAR93	A4	JUL93	33
Vallferrera	M	273	A4	MAR93	A4	JUL93	0
Vallferrera		180	A4	MAR93	A2	JUL93	-233
Vallferrera		178	A4	MAR93	A4	JUL93	33
Vallferrera	F	167	A4	MAR93	A4	JUL93	33
Vallferrera	F	169	A4	MAR93	A4	JUL93	0
Vallferrera		195	A4	MAR93	A5	JUL93	67
Vallferrera		208	A4	MAR93	A4	JUL93	33
Vallferrera		213	A4	MAR93	A5	JUL93	133
Vallferrera		210	A4	MAR93	A4	JUL93	33
Vallferrera		198	A4	MAR93	A4	JUL93	33
Vallferrera	F	210	A4	MAR93	A4	JUL93	0
Vallferrera	M	237	A4	MAR93	A4	JUL93	0
Vallferrera	F	243	A4	MAR93	A4	JUL93	33
Vallferrera		169	A4	MAR93	A4	JUL93	0
Vallferrera	F	199	A4	MAR93	A4	JUL93	0
Vallferrera		223	A4	MAR93	A4	JUL93	0
Vallferrera	F	292	A4	MAR93	A4	JUL93	0
Vallferrera		238	A4	MAR93	A4	JUL93	0
Vallferrera		213	A4	MAR93	A5	JUL93	34
Vallferrera		252	A4	MAR93	A4	JUL93	-33
Vallferrera		196	A4	MAR93	A4	JUL93	0
Vallferrera	M	301	A4	MAR93	A5	JUL93	34
Vallferrera		306	A4	MAR93	A4	JUL93	0
Vallferrera	M	214	A4	MAR93	A4	JUL93	0
Vallferrera	M	190	A4	MAR93	A4	JUL93	33
Vallferrera		197	A4	MAR93	A4	JUL93	0
Vallferrera		260	A4	MAR93	A4	JUL93	0
Vallferrera	F	186	A4	MAR93	A4	JUL93	33
Vallferrera	M	177	A4	MAR93	A4	JUL93	0
Vallferrera	F	221	A4	MAR93	A4	JUL93	33
Vallferrera		192	A4	MAR93	A5	JUL93	67
Vallferrera		193	A4	MAR93	A4	JUL93	33
Vallferrera	M	217	A4	MAR93	A5	JUL93	67
Vallferrera	M	212	A4	MAR93	A4	JUL93	0
Vallferrera		232	A4	MAR93	A4	JUL93	33
Vallferrera		248	A4	MAR93	A4	JUL93	0
Vallferrera		240	A4	MAR93	A4	JUL93	0
Vallferrera	F	183	A4	MAR93	A4	JUL93	0
Vallferrera		195	A4	MAR93	A4	JUL93	0
Vallferrera		244	A4	MAR93	A4	JUL93	0
Vallferrera	M	190	A4	MAR93	A4	JUL93	0
Vallferrera		172	A4	MAR93	A4	JUL93	0
Vallferrera		188	A4	MAR93	A4	JUL93	0
Vallferrera	F	247	A4	MAR93	A4	JUL93	0
Vallferrera	M	194	A5	MAR93	A5	JUL93	0
Vallferrera	F	196	A5	MAR93	A1	JUL93	-367
Vallferrera		166	A5	MAR93	A5	JUL93	66
Vallferrera		172	A5	MAR93	A5	JUL93	0
Vallferrera	M	188	A5	MAR93	A5	JUL93	33
Vallferrera		223	A5	MAR93	A5	JUL93	0
Vallferrera	M	162	A5	MAR93	A5	JUL93	33
Vallferrera		201	A5	MAR93	A5	JUL93	0
Vallferrera	F	217	A5	MAR93	A5	JUL93	0
Vallferrera		232	A5	MAR93	A5	JUL93	0
Vallferrera	F	270	A5	MAR93	A5	JUL93	0
Vallferrera	F	291	A5	MAR93	A5	JUL93	0
Vallferrera	F	272	A5	MAR93	A5	JUL93	0
Vallferrera		207	A5	MAR93	A5	JUL93	0
Vallferrera		214	A5	MAR93	A5	JUL93	0
Vallferrera		188	A5	MAR93	A5	JUL93	66
Vallferrera		201	A5	MAR93	A5	JUL93	33
Vallferrera		257	A5	MAR93	A5	JUL93	0
Vallferrera		312	A5	MAR93	A4	JUL93	-34
Vallferrera	M	336	A5	MAR93	A5	JUL93	0
Vallferrera	M	215	A5	MAR93	A5	JUL93	33
Vallferrera	M	242	A5	MAR93	A5	JUL93	0
Vallferrera	F	233	A5	MAR93	A5	JUL93	0
Vallferrera		262	A5	MAR93	A5	JUL93	0
Vallferrera	F	311	A5	MAR93	A5	JUL93	0
Vallferrera	F	231	A5	MAR93	A5	JUL93	0
Vallferrera	F	231	A5	MAR93	A5	JUL93	0
Vallferrera	F	226	A5	MAR93	A5	JUL93	0
Vallferrera		244	A5	MAR93	A5	JUL93	0
Vallferrera		262	A5	MAR93	A5	JUL93	0
Vallferrera		261	A5	MAR93	A5	JUL93	0
Vallferrera		281	A5	MAR93	A5	JUL93	0
Vallferrera		322	A5	MAR93	A5	JUL93	0
Vallferrera		174	A5	MAR93	A5	JUL93	0
Vallferrera	F	243	A5	MAR93	A5	JUL93	33
Vallferrera		248	A5	MAR93	A5	JUL93	0
Vallferrera		257	A5	MAR93	A5	JUL93	33
Vallferrera		212	A5	MAR93	A5	JUL93	33
Vallferrera	M	172	A5	MAR93	A5	JUL93	0
Vallferrera		282	A5	MAR93	A5	JUL93	0
Vallferrera	F	196	B3	JUL93	B1	NOV93	200
Vallferrera	F	230	B3	JUL93	B2	NOV93	67
Vallferrera		200	B2	JUL93	B2	NOV93	0
Vallferrera		195	B3	JUL93	A2	NOV93	667
Vallferrera	M	232	B2	JUL93	B1	NOV93	67
Vallferrera	M	196	B3	JUL93	C2	NOV93	259
Vallferrera	F	222	B2	JUL93	C3	NOV93	250
Vallferrera	M	236	A4	JUL93	B2	NOV93	-800
Vallferrera	F	209	B2	JUL93	B2	NOV93	33
Vallferrera	F	191	B2	JUL93	B2	NOV93	0
Vallferrera	F	254	B2	JUL93	A3	NOV93	700
Vallferrera		194	B2	JUL93	B2	NOV93	33
Vallferrera	M	204	C9	JUL93	B3	NOV93	-467
Vallferrera	F	220	B1	JUL93	B3	NOV93	-167
Vallferrera		180	B1	JUL93	C3	NOV93	84
Vallferrera	M	177	B1	JUL93	B3	NOV93	-200
Vallferrera		176	B1	JUL93	B3	NOV93	-200
Vallferrera	F	191	B1	JUL93	C1	NOV93	34
Vallferrera	F	196	B1	JUL93	B3	NOV93	-167
Vallferrera	M	235	C1	JUL93	A3	NOV93	566
Vallferrera	M	224	C1	JUL93	C12	NOV93	275
Vallferrera	M	217	B1	JUL93	B3	NOV93	-200
Vallferrera	F	210	B1	JUL93	B3	NOV93	-200
Vallferrera		205	C6	JUL93	C12	NOV93	150
Vallferrera	M	167	A2	JUL93	A2	NOV93	-33
Vallferrera	F	194	C1	JUL93	C1	NOV93	0
Vallferrera	F	249	C2	JUL93	C1	NOV93	-25
Vallferrera	F	260	C1	JUL93	C3	NOV93	50
Vallferrera	M	213	C2	JUL93	A2	NOV93	441
Vallferrera		210	C1	JUL93	C10	NOV93	225
Vallferrera		181	C2	JUL93	C2	NOV93	0
Vallferrera		211	C11	JUL93	C3	NOV93	-200
Vallferrera	M	201	B2	JUL93	C4	NOV93	209
Vallferrera	F	252	C1	JUL93	C1	NOV93	0
Vallferrera	M	173	C4	JUL93	C3	NOV93	-25
Vallferrera		176	C4	JUL93	C4	NOV93	0
Vallferrera		199	C5	JUL93	C10	NOV93	125
Vallferrera	F	231	C4	JUL93	C4	NOV93	0
Vallferrera	F	178	C6	JUL93	C5	NOV93	-25
Vallferrera	M	254	C5	JUL93	C6	NOV93	25
Vallferrera		159	C5	JUL93	C5	NOV93	0
Vallferrera	F	179	C6	JUL93	C3	NOV93	-75
Vallferrera	F	233	C12	JUL93	C9	NOV93	-75
Vallferrera	M	255	C6	JUL93	C6	NOV93	0
Vallferrera	M	216	C5	JUL93	C6	NOV93	25
Vallferrera	M	173	C9	JUL93	C8	NOV93	-25
Vallferrera	F	215	C6	JUL93	C6	NOV93	0
Vallferrera	M	203	C7	JUL93	A1	NOV93	183
Vallferrera		211	C7	JUL93	C8	NOV93	25
Vallferrera	F	245	C7	JUL93	C7	NOV93	0
Vallferrera		170	C8	JUL93	C8	NOV93	0
Vallferrera	F	207	C8	JUL93	C8	NOV93	0
Vallferrera	F	226	C8	JUL93	C8	NOV93	0
Vallferrera		182	C9	JUL93	C9	NOV93	0
Vallferrera	F	165	C9	JUL93	C9	NOV93	0
Vallferrera	F	190	C11	JUL93	C11	NOV93	0
Vallferrera	F	206	A3	JUL93	C11	NOV93	-250
Vallferrera	F	230	C12	JUL93	A1	NOV93	25
Vallferrera	M	197	C12	JUL93	C12	NOV93	0
Vallferrera	M	253	C12	JUL93	C12	NOV93	0
Vallferrera	F	261	C10	JUL93	B2	NOV93	-392
Vallferrera	F	218	C11	JUL93	C12	NOV93	25
Vallferrera	M	213	A1	JUL93	A1	NOV93	0
Vallferrera	M	167	A1	JUL93	A1	NOV93	0
Vallferrera		203	A1	JUL93	A2	NOV93	166
Vallferrera	M	204	A1	JUL93	A2	NOV93	100
Vallferrera	M	193	A1	JUL93	A1	NOV93	0
Vallferrera	F	239	A1	JUL93	A1	NOV93	33
Vallferrera	F	217	A1	JUL93	A3	NOV93	167
Vallferrera	F	224	A1	JUL93	A1	NOV93	0
Vallferrera	F	234	A1	JUL93	A1	NOV93	0
Vallferrera	F	251	C12	JUL93	A1	NOV93	25
Vallferrera	M	258	A1	JUL93	A1	NOV93	0
Vallferrera	M	176	A1	JUL93	A1	NOV93	33
Vallferrera	M	193	A1	JUL93	A1	NOV93	0
Vallferrera	M	185	C12	JUL93	A1	NOV93	58
Vallferrera		176	A2	JUL93	A2	NOV93	33
Vallferrera	F	200	A2	JUL93	A3	NOV93	67
Vallferrera	F	208	A2	JUL93	A2	NOV93	33
Vallferrera	M	287	A2	JUL93	A2	NOV93	0
Vallferrera	F	257	A2	JUL93	A2	NOV93	0
Vallferrera	M	209	A3	JUL93	A3	NOV93	0
Vallferrera	M	212	C2	JUL93	A2	NOV93	441
Vallferrera	F	226	A3	JUL93	A3	NOV93	0
Vallferrera	M	177	A3	JUL93	A3	NOV93	0
Vallferrera		203	A3	JUL93	A3	NOV93	0
Vallferrera	M	240	A3	JUL93	A3	NOV93	33
Vallferrera	M	193	A2	JUL93	A2	NOV93	0
Vallferrera	M	254	A5	JUL93	A5	NOV93	0
Vallferrera	M	225	A2	JUL93	A2	NOV93	0
Vallferrera	M	250	A2	JUL93	A2	NOV93	33
Vallferrera	M	221	A3	JUL93	A3	NOV93	0
Vallferrera	M	252	A3	JUL93	A3	NOV93	0
Vallferrera	M	238	A3	JUL93	A3	NOV93	0
Vallferrera	M	250	A2	JUL93	A2	NOV93	33
Vallferrera	F	254	A3	JUL93	A3	NOV93	66
Vallferrera	F	224	A3	JUL93	A3	NOV93	0
Vallferrera		193	A3	JUL93	A3	NOV93	33
Vallferrera	F	188	A3	JUL93	A3	NOV93	0
Vallferrera	F	221	A3	JUL93	A3	NOV93	0
Vallferrera	F	226	A3	JUL93	A3	NOV93	0
Vallferrera		238	A3	JUL93	A3	NOV93	0
Vallferrera	M	226	A3	JUL93	A3	NOV93	33
Vallferrera		176	A3	JUL93	A1	NOV93	-200
Vallferrera	M	303	A3	JUL93	A3	NOV93	33
Vallferrera	F	181	A3	JUL93	A3	NOV93	33
Vallferrera		206	A3	JUL93	A3	NOV93	33
Vallferrera	F	211	A3	JUL93	A3	NOV93	33
Vallferrera	M	202	A3	JUL93	A4	NOV93	100
Vallferrera	M	188	A4	JUL93	A4	NOV93	0
Vallferrera	F	239	A3	JUL93	A3	NOV93	33
Vallferrera	M	236	A4	JUL93	A3	NOV93	-67
Vallferrera	F	242	A2	JUL93	A3	NOV93	67
Vallferrera	F	257	A3	JUL93	A3	NOV93	0
Vallferrera	M	234	A3	JUL93	A3	NOV93	0
Vallferrera	F	277	A3	JUL93	A3	NOV93	0
Vallferrera		179	A3	JUL93	A3	NOV93	0
Vallferrera	M	211	A3	JUL93	A3	NOV93	0
Vallferrera	F	246	A3	JUL93	A3	NOV93	0
Vallferrera	F	195	A4	JUL93	A3	NOV93	-34
Vallferrera	F	237	A3	JUL93	A3	NOV93	0
Vallferrera	F	202	A3	JUL93	A3	NOV93	0
Vallferrera	F	242	A3	JUL93	A3	NOV93	0
Vallferrera	M	235	A3	JUL93	A3	NOV93	33
Vallferrera		177	A3	JUL93	A3	NOV93	0
[truncated: 935 more rows]

## Sheet: Habitat
River	Date	AREA	Density	Biomass	Mean width	Mean depth	V50	V100	Cover	Boulder	Cobble	Gravel	Sand	Silt	Organic
Flamicell	MAR93	F9	919.355	11.0372	6.2	11.5294	0.905455	1.06045	5.54545	17.9091	34.9091	19.5455	14	7.54545	2.54545
Flamicell	MAR93	F8	783.933	3.26997	6.68182	13.8068	0.488182	0.544545	13.4545	24.6364	20.0909	16.3636	12.2727	17.7273	8.90909
Flamicell	MAR93	F7	2787.1	97.8731	4.64545	14.8438	0.731818	0.796818	18.2727	54.1818	11.5455	10.7273	7.63636	4.54545	11.3636
Flamicell	MAR93	F6	2535.39	102.45	10.0182	16.3821	0.461364	0.64	11.9091	29.6364	22.3636	14.1818	12	5.18182	16.6364
Flamicell	MAR93	F5	2329.69	65.0384	4.16364	9.09836	0.527727	0.63	2.81818	10.2727	58.4545	11.0909	13	1.63636	5.54545
Flamicell	MAR93	CNC	5429.29	123.562	5.36154	8.69318	0.423462	0.531538	3.61538	9.84615	43.6923	19.3077	17.8462	2.53846	6.76923
Flamicell	MAR93	F4	1835.29	39.6374	2.61111	8.85135	0.793611	0.751611	1.61111	2.66667	30.2778	35.0556	22.2778	1.77778	5.44444
Flamicell	MAR93	F3	425.32	7.30746	5.25556	8.30508	0.493333	0.606667	9	18.8889	50.2222	12.2222	9.66667	1.88889	7.11111
Flamicell	MAR93	F2	0	0	5.50909	8.21918	0.392727	1.21727	4.81818	13.5455	49.0909	9.36364	8.18182	4.81818	15
Flamicell	MAR93	F1	0	0	4.70625	9.03061	0.53625	0.58625	5.25	14.3125	49.4375	12.625	9.875	2.75	11
Flamicell	MAR93	S1	296.296	5.7807	5.4	8.65854	0.465833	0.530833	12.5	25.5	44.8333	11	9.16667	2.16667	7.33333
Flamicell	MAR93	S2	1460.08	20.262	4.38333	10	0.5925	0.695833	23.3333	42.1667	29	9.5	7.5	3	8.83333
Flamicell	MAR93	S3	2037.74	32.052	3.53333	10	0.6375	0.7775	24.5	41.5	35.5	10.6667	7	1.33333	4
Flamicell	MAR93	S4	1027.24	11.6512	4.28333	8.57143	0.581667	0.646667	16	30.8333	35	11.8333	13	3	6.33333
Flamicell	MAR93	S5	1494.16	19.282	4.28333	8.82353	0.4675	0.513333	14.6667	33.3333	31	14.3333	11	2.5	7.83333
Flamicell	MAR93	S6	2234.82	35.162	4.11667	9.24242	0.575	0.690833	25.8333	39	32.6667	10.5	9	3	5.83333
Flamicell	MAR93	S7	2400	39.9767	5.33333	8.875	0.608333	0.699167	22	33.3333	30.5	11.3333	11.1667	4.83333	8.83333
Flamicell	MAR93	S8	3857.14	123.865	3.73333	10.4839	0.625	0.7125	12.3333	27.7233	46.61	9.5	8.33333	2	5.83333
Flamicell	MAR93	S9	2729.41	40.3453	4.25	10	0.283333	0.535833	13.1667	24.5	40	11.3333	11.6667	3.83333	8.66667
Flamicell	MAR93	S10	3428.57	63.5842	4.43333	8.57143	0.5	0.618333	14.8333	25.1667	46.3333	9.16667	9.83333	2.66667	6.83333
Flamicell	MAR93	S11	2769.23	44.72	5.2	7.75	0.414167	0.496667	20.5	37	30.8333	10.6667	10.5	3.5	7.5
Flamicell	MAR93	S12	2649.35	51.8655	5.13333	9.48718	0.469167	0.555833	15.8333	23.1667	22.5	19.1667	22.3333	5.66667	7.16667
Flamicell	MAR93	L1	3453.47	49.0056	5.63333	10.8929	0.536667	0.555833	13.9167	27.5833	31.6667	13.25	15.5833	6.91667	5
Flamicell	MAR93	L2	3945.46	85.5141	6.91	11.6867	0.596	0.695	12.4	26.7	37.8	9.5	14.7	7.6	3.7
Flamicell	MAR93	L3	3178.24	186.511	7.40833	18.0189	0.676667	0.814167	28.1333	38.7333	23.1333	11.8	18.2	4.8	3.33333
Flamicell	JUL93	F9	1400.88	90.484	5.79	10.4167	0.57912	0.665988	18.3	35.9	36	13.4	8.5	2.3	1.6
Flamicell	JUL93	F8	709.677	28.1934	4.22727	11.6667	0.225829	0.261851	15.4545	31.7273	20.1818	23.0909	10.1818	9.27273	5.54545
Flamicell	JUL93	F7	2063.65	110.042	5.42727	18.0405	0.651164	0.728749	18.3636	43.2727	33.8182	11.8182	8.45455	1.18182	1.45455
Flamicell	JUL93	F6	2734.25	168.343	7.93636	21.88	0.727364	0.789848	21.5455	55.9091	23.1818	12.2727	4	1.63636	3
Flamicell	JUL93	F5	1453.87	87.9257	3.64545	8.48214	0.514004	0.547255	21.7273	26.4545	29.2727	30.9091	9.27273	2.45455	1.63636
Flamicell	JUL93	CNC	3199	132.709	5.36154	8.69318	0.423462	0.531538	3.61538	9.84615	43.6923	19.3077	17.8462	2.53846	6.76923
Flamicell	JUL93	F4	1130.77	44.6535	4.38333	9.15493	0.30353	0.35814	14.4167	23.1667	30	26	14.3333	4.08333	2.41667
Flamicell	JUL93	F3	703.125	23.7254	4.8	6.2963	0.419947	0.453813	24.7778	39.4444	23	21.3333	10.8889	3.55556	1.77778
Flamicell	JUL93	F2	0	0	3.68182	6.92982	0.270164	0.288175	15.6364	26	28.6364	23.9091	14	5.36364	2.09091
Flamicell	JUL93	F1	56.5895	6.31764	3.78667	7.1875	0.428752	0.478536	11.8667	25.9333	30.8667	14.4667	10.6667	6.33333	11.7333
Flamicell	JUL93	S1	0	0	5.03333	6.92308	0.329184	0.39116	28.3333	49.1667	14.1667	16.1667	8	3	9.5
Flamicell	JUL93	S2	0	0	4.01667	9.84848	0.40132	0.42164	32.1667	58.8333	15.5	9	8.66667	1.5	6.5
Flamicell	JUL93	S3	0	0	3.55	9.35484	0.34798	0.42672	34	65.6667	6.66667	12.6667	10.3333	1.66667	3
Flamicell	JUL93	S4	0	0	3.4	10.1667	0.3683	0.40386	22.3333	47.5	11.8333	20.3333	11.8333	3.66667	4.83333
Flamicell	JUL93	S5	0	0	3.31667	12.8846	0.3556	0.38354	38.1667	48.3333	6.5	26.6667	11.6667	2	4.83333
Flamicell	JUL93	S6	0	0	3.7	11.8966	0.43942	0.49022	16.6667	33.1667	23	25.3333	9	3.33333	6.16667
Flamicell	JUL93	S7	0	0	4.25	10.4412	0.37338	0.4318	7.66667	21.1667	27.1667	25.5	18.6667	4.83333	2.66667
Flamicell	JUL93	S8	0	0	3.41667	11.6129	0.34544	0.39116	17	42	25.3333	20	8	3.16667	1.5
Flamicell	JUL93	S9	0	0	4.23333	11.2121	0.32512	0.381	15.6667	30.5	40.6667	13.6667	9.16667	4.33333	1.66667
Flamicell	JUL93	S10	0	0	4.6	9.54545	0.3302	0.35052	24.6667	38.5	29	16.6667	10.5	3.5	1.83333
Flamicell	JUL93	S11	274.809	7.10133	4.36667	8.42857	0.42926	0.46228	11.5	24.6667	36	25.1667	10	2.33333	1.83333
Flamicell	JUL93	S12	0	0	4.2	8.5	0.36322	0.42418	11.6667	24.6667	28.6667	33.5	6.83333	5.16667	1.16667
Flamicell	JUL93	L1	1064.3	32.0591	4.44167	10.8696	0.38354	0.4445	21.25	35.4167	22.6667	15.8333	18.5	5.66667	1.91667
Flamicell	JUL93	L2	1200.27	44.1865	6.48	16.5	0.670712	0.696468	18.2	34.8	25.6	15.3	16.1	4.8	3.4
Flamicell	JUL93	L3	5687.07	342.517	4.77273	11.3433	0.250767	0.263236	13	26.0909	21.5455	30.6364	14.6364	4.09091	3
Flamicell	OCT93	F9	593.897	60.8356	3.87273	1.90909	0.583276	0.626225	10.4545	21.9091	46.4545	14.3636	12.6364	1.90909	2.72727
Flamicell	OCT93	F8	773.869	73.74	3.61818	1.81818	0.558338	0.584662	9.54545	17.0909	50.6364	15.8182	12.7273	1.81818	1.90909
Flamicell	OCT93	F7	1654.94	130.964	5.38333	2.75	0.59436	0.62865	20.9167	47	29.5833	11.1667	6.41667	2.75	3.08333
Flamicell	OCT93	F6	4757.31	397.463	8.35556	4	0.59944	0.699347	23.3333	41.1111	31.5556	12.1111	8	4	3.22222
Flamicell	OCT93	F5	2486.36	162.777	3.4	1.45455	0.523702	0.587433	17.8182	36.7273	32.4545	14.3636	12.6364	1.45455	2.36364
Flamicell	OCT93	CNC	3199	184.776	5.36154	8.69318	0.423462	0.531538	3.61538	9.84615	43.6923	19.3077	17.8462	2.53846	6.76923
Flamicell	OCT93	F4	2160.57	98.7836	5.13333	1.16667	0.42672	0.46609	12.1667	26.3333	36.6667	18.0833	15.3333	1.16667	2.41667
Flamicell	OCT93	F3	637.944	44.6009	4.62222	1.77778	0.338667	0.357293	10.4444	24.6667	42.7778	14.7778	12.6667	1.77778	3.33333
Flamicell	OCT93	F2	0	0	3.82727	1.36364	0.418407	0.448887	11.2727	21.4545	44	19.0909	11.7273	1.36364	2.36364
Flamicell	OCT93	F1	0	0	4.24667	2.26667	0.46736	0.529336	17	29.2	32.8	18.4	14.6	2.26667	2.73333
Flamicell	OCT93	S1	158.73	11.8688	6.3	3	0.5715	0.69342	22.5	36	20	20	16.5	3	4.5
Flamicell	OCT93	S2	183.486	12.3859	5.45	3	0.51054	0.54102	18.5	36	24	15	17.5	3	4.5
Flamicell	OCT93	S3	263.158	2.92955	3.8	2.5	0.7239	0.8382	32	52	10	14.5	18.5	2.5	2.5
Flamicell	OCT93	S4	0	0	3.9	3	0.66294	0.70866	24	56.5	19	10.5	8	3	3
Flamicell	OCT93	S5	198.02	2.34729	5.05	3	0.8001	0.85344	24	47	20.5	13	13	3	3.5
Flamicell	OCT93	S6	210.526	1.34328	4.75	3.5	0.70104	0.71628	24.5	54	14	13	12.5	3.5	3
Flamicell	OCT93	S7	156.25	9.15045	6.4	3	0.71628	0.8001	14.5	31	20	19	23	3	4
Flamicell	OCT93	S8	384.615	18.0845	5.2	3	0.90678	0.96774	40.5	51	17	13.5	12	3	3.5
Flamicell	OCT93	S9	373.832	17.9503	5.35	2.5	0.85344	0.8763	9	42.5	40	4	6	2.5	5
Flamicell	OCT93	S10	357.143	29.5414	5.6	3.5	0.79248	0.8382	26	39.5	35	10.5	8	3.5	3.5
Flamicell	OCT93	S11	677.966	7.9119	5.9	2.5	0.73914	0.82296	16.5	39	41	6.5	8	2.5	3
Flamicell	OCT93	S12	206.186	1.7604	4.85	3.5	0.55626	0.60198	14.5	23	42.5	12	16	3.5	3
Flamicell	OCT93	L1	1063.83	76.0745	4.7	2.81818	0.674716	0.719051	34.9091	50.1818	23.9091	10.4545	9.54545	2.81818	3.09091
Flamicell	OCT93	L2	1684.03	153.215	6.4	3.2	0.641604	0.696468	20	42.8	26	11.4	13	3.2	3.6
Flamicell	OCT93	L3	4505.85	424.207	6.99091	3.45455	0.461356	0.512618	21.6364	39.0909	22.7273	14.0909	17.0909	3.45455	3.54545
Flamicell	JUN94	F9	109.127	14.1499	4.58182	12.9104	0.940909	1.05	5.90909	14.0909	33.9091	24.0909	12.4545	8.36364	7.09091
Flamicell	JUN94	F8	800	70.177	0	0	0	0	0	0	0	0	0	0	0
Flamicell	JUN94	F7	759.712	79.0456	6.31818	18.5465	1.60455	1.81818	16.5455	36.5455	35.7273	13.2727	6.72727	3.18182	4.54545
Flamicell	JUN94	F6	2388.71	253.518	8.37273	18.4804	1.4	1.53636	23.2727	38.7273	31.1818	14.8182	7.81818	3.45455	4
Flamicell	JUN94	F5	854.822	44.2643	4.06364	9.01639	1.28636	1.45	4.45455	14.9091	52.5455	15.6364	8	3.54545	1.90909
Flamicell	JUN94	CNC	856.07	60.6337	5.36154	8.69318	0.423462	0.531538	3.61538	9.84615	43.6923	19.3077	17.8462	2.53846	6.76923
Flamicell	JUN94	F4	317.778	9.87889	5.76923	10.6915	1.16154	1.28077	1.76923	8.30769	54.8462	17.7692	9.76923	5.30769	4
Flamicell	JUN94	F3	1090.91	78.0794	5.5	11.5873	1.12222	1.26667	4.22222	10.6667	44.6667	19	12.4444	6.11111	7.11111
Flamicell	JUN94	F2	362.944	7.80178	3.58182	6.75439	0.75	0.8	6.81818	16.3636	42.1818	18.5455	8.90909	6.36364	7.63636
Flamicell	JUN94	L1	3473.68	169.732	3.10909	12.549	0.409091	0.477273	5	21.7273	31.3636	16.7273	10.4545	11.9091	7.81818
Flamicell	JUN94	L2	2874.26	210.433	4.62727	11.9231	0.65	0.709091	8.81818	23.3636	40.8182	13.3636	9.36364	7.81818	5.27273
Flamicell	JUN94	L3	4276.71	341.871	5.19091	10.8824	0.545455	0.559091	7.09091	22.8182	27	19	17.7273	8.90909	4.54545
Flamicell	OCT94	F9	391.036	12.6519	5.88182	13.0488	0.631767	0.680258	4	11.3636	68.1818	11.0909	4.81818	2.36364	2.18182
Flamicell	OCT94	F8	1501.71	38.1553	5.32727	13.8	0.641465	0.699655	12.2727	16.2727	61.5455	11.5455	4.90909	2.36364	3.36364
Flamicell	OCT94	F7	4381.06	209.864	5.96	17.0946	0.66294	0.707136	22.2	33.8	48.4	11.8	3.7	1.1	1.2
Flamicell	OCT94	F6	3445.08	382.607	8.46364	20.6818	0.651164	0.724593	19.2727	41.5455	39.5455	10.1818	4.90909	1.54545	2.27273
Flamicell	OCT94	F5	2475.64	126.654	3.91818	13.3051	0.505691	0.599902	7.54545	30.7273	51.7273	10.4545	3.54545	1.36364	2.18182
Flamicell	OCT94	CNC	2816.02	117.496	5.36154	8.69318	0.423462	0.531538	3.61538	9.84615	43.6923	19.3077	17.8462	2.53846	6.76923
Flamicell	OCT94	F4	2430.65	85.2952	5.63636	11.3924	0.471055	0.559724	3.54545	11.2727	65.1818	12.6364	4.81818	2.81818	3.27273
Flamicell	OCT94	F3	2258.5	162.295	4.9	12.3276	0.491067	0.541867	10.7778	29.7778	47.8889	13.1111	4.44444	2.11111	2.66667
Flamicell	OCT94	F2	364.522	18.9114	4.66364	11.7424	0.454429	0.504305	4.54545	15.7273	68.3636	6.81818	5	1.27273	2.81818
Flamicell	OCT94	F1	66.4176	6.84498	5.01875	13.4184	0.526733	0.59436	13.375	26.5	46.75	14.25	7	2.6875	2.8125
Flamicell	OCT94	S1	0	0	5.8	17.4419	0.4318	0.4953	10.8333	19.5	58.6667	12.8333	4.83333	1.83333	2.33333
Flamicell	OCT94	S2	229.299	15.6761	5.23333	15.875	0.3937	0.45974	19.3333	40.3333	33.5	14	6.66667	2.5	3
Flamicell	OCT94	S3	408.511	28.7243	3.91667	15	0.56388	0.62738	27.1667	60.6667	25.6667	7.16667	3.83333	1.33333	1.33333
Flamicell	OCT94	S4	90.9091	0.980247	4.4	16	0.59436	0.66548	26	54.8333	29.3333	8.66667	3.66667	1.83333	1.66667
Flamicell	OCT94	S5	95.6175	31.2981	4.18333	18.2353	0.53086	0.5969	15.3333	43.3333	32.3333	14.5	6.83333	1.5	1.5
Flamicell	OCT94	S6	110.599	3.78732	3.61667	14.6774	0.56896	0.63754	4.16667	30	50	12	5.16667	1.5	1.33333
Flamicell	OCT94	S7	0	0	5.05	14.8718	0.51816	0.60452	9	35.1667	41.1667	12.8333	6.16667	2.5	2.16667
Flamicell	OCT94	S8	270.677	29.4498	4.43333	16.5714	0.52324	0.59944	15.8333	36.8333	33.5	17.5	7	2.33333	2.83333
Flamicell	OCT94	S9	385.852	18.1603	5.18333	15.9756	0.32512	0.38862	20.1667	45.3333	26.1667	15.8333	7.33333	2.5	2.83333
Flamicell	OCT94	S10	150	5.11654	5.33333	14.375	0.58674	0.70866	26.3333	61.6667	20.8333	8.16667	4.66667	2	2.66667
Flamicell	OCT94	S11	0	0	4.78333	15.3947	0.41148	0.47244	13.6667	33	44.6667	11.6667	6.83333	2	1.83333
Flamicell	OCT94	S12	428.571	50.9781	4.66667	17.2222	0.508	0.60198	5.33333	25	49.8333	11.8333	8.5	2.83333	2
Flamicell	OCT94	L1	1293.99	63.3454	5.05833	17.8846	0.4572	0.51054	17.25	36.8333	39.0833	12.3333	7.41667	2.66667	1.66667
Flamicell	OCT94	L2	2471	189.77	6.61	17.625	0.460248	0.507492	8.3	28.1	42.9	13.3	9	3.8	2.9
Flamicell	OCT94	L3	4137.31	320.293	6.09091	18.012	0.266007	0.307571	20.3636	44.3636	29.9091	13.6364	8.27273	2	1.81818
Vallferrera	MAR93	B3	3575.91	223.065	5.50909	15.1974	0.748182	0.835	23.9091	50.7273	37.9091	4.81818	3.09091	1.36364	2.09091
Vallferrera	MAR93	B2	2114.87	148.529	7.51818	12.4479	0.600909	0.705909	17.7273	43.4545	41.7273	5.72727	4.18182	2.45455	2.45455
Vallferrera	MAR93	B1	2687.02	164.535	5.95455	16.1875	0.746818	0.805455	13.6364	35.7273	48.3636	6.72727	4	2.18182	3
Vallferrera	MAR93	C1	4083.92	297.443	7.15	12.6531	0.731667	0.7775	18.3333	36.1667	46.8333	6.5	4.33333	2.66667	3.5
Vallferrera	MAR93	C2	2491.02	100.362	8.35	12.069	0.721667	0.740833	12.5	26.6667	55.8333	8	4	2.5	3
Vallferrera	MAR93	C3	3493.67	247.932	7.9	14.4737	0.688333	0.785833	16.3333	30.5	54.3333	5.83333	5	2	2.33333
Vallferrera	MAR93	C4	3428.57	272.585	6.88333	14.6875	0.914167	1.0125	22	41.8333	40	7.83333	4.83333	2.33333	3.16667
Vallferrera	MAR93	C5	1772.15	97.2356	7.9	15.4545	0.7375	0.826667	13.3333	24.6667	47.3333	10.6667	9.66667	3.16667	4.5
Vallferrera	MAR93	C6	4800	386.407	5.75	21.5476	0.685	0.709167	21	36	37.1667	11.3333	8	3.33333	4.16667
Vallferrera	MAR93	C7	2322.58	136.031	6.2	17.2222	0.805833	0.95	13.1667	30.1667	46.3333	9.16667	7	3.16667	4.16667
Vallferrera	MAR93	C8	4542.37	302.725	5.9	13.1818	0.8675	0.933333	15.1667	33.1667	47.8333	8.33333	4.5	2.5	3.66667
Vallferrera	MAR93	C9	3377.4	202.194	7.81667	14.4643	0.774167	0.795	18.5	40	41.1667	7.33333	4.33333	3	4.16667
Vallferrera	MAR93	C10	3512.2	194.927	6.15	17.5	0.791667	0.864167	10.3333	23.5	57.6667	8.83333	5.5	2.16667	2.33333
Vallferrera	MAR93	C11	4990.83	239.179	5.45	15.4878	0.715833	0.754167	8.16667	24	52.8333	8.83333	4.66667	2	7.66667
Vallferrera	MAR93	C12	3145.3	198.411	5.85	15.3488	0.8625	0.895833	16.1667	35.3333	42.8333	7.5	6.5	3	4.83333
Vallferrera	MAR93	A1	5361.68	359.067	7.59091	15.1515	0.773182	0.814091	13.7273	31.8182	40.8182	10.3636	8.90909	3.45455	4.63636
Vallferrera	MAR93	A2	5857.14	421.946	8.4	14.717	0.85	0.868591	16.5455	39.6364	34.2727	9.18182	7.45455	4.36364	5.09091
Vallferrera	MAR93	A3	5267.5	422.887	8.99167	15.4032	0.7	0.7625	16.1667	32.3333	35.0833	12	9.58333	5	6
Vallferrera	MAR93	A4	5775.08	503.439	6.58	21.3462	0.642	0.7595	21.3	43.6	26	11.1	8.5	5.1	5.7
Vallferrera	MAR93	A5	1750	186.187	10	12.9762	0.776364	0.824545	18	47.0909	16.2727	11.9091	8.72727	6.36364	9.63636
Vallferrera	JUL93	B3	4221.34	329.231	5.70909	14.7468	0.587433	0.65532	22.0909	44.0909	32.0909	9	6.54545	3.54545	4.81818
Vallferrera	JUL93	B2	3653.04	326.396	7.26667	11.7961	0.62992	0.64897	20.9167	41.3333	40.8333	6.16667	4.16667	3.08333	4.5
Vallferrera	JUL93	B1	3221.18	234.621	5.83636	15.3289	0.638695	0.680258	21.8182	40.1818	42.6364	5.09091	3	2.81818	6.27273
Vallferrera	JUL93	C1	3296.7	341.315	6.06667	15.4651	0.77978	0.81026	24.1667	43.1667	39.3333	5.33333	3.5	2.5	6.16667
Vallferrera	JUL93	C2	3449.13	183.342	7.51667	13.7736	0.55118	0.55626	15.6667	31.5	53.8333	4.5	2.5	2.33333	5.33333
Vallferrera	JUL93	C3	1633.8	79.2111	7.1	15.3	0.51816	0.5334	12.5	22.3333	60.1667	5.83333	3.33333	2.5	5.83333
Vallferrera	JUL93	C4	4130.43	352.769	6	18.2955	0.66294	0.72644	23.1667	38.8333	46.3333	3.5	2	2.66667	6.66667
Vallferrera	JUL93	C5	2204.08	144.243	6.53333	13.8542	0.9779	0.99314	33	52.3333	33.1667	3.83333	2	2.16667	6.5
Vallferrera	JUL93	C6	3667.56	312.193	6.21667	22.1111	0.6223	0.6985	22.3333	37.6667	45	6.16667	3.16667	3.33333	4.66667
Vallferrera	JUL93	C7	5037.9	444.976	5.71667	16.0714	0.98298	1.0668	33.3333	53.3333	32.5	3.83333	2	2.16667	6.16667
Vallferrera	JUL93	C8	3354.04	210.897	5.75	16.7045	1.02108	1.0795	27.8333	49.3333	35.1667	4.16667	2.5	2.16667	6.66667
Vallferrera	JUL93	C9	3626.67	269.67	7.5	13.9091	0.9271	0.98806	22.1667	43.5	38.8333	4.83333	3.16667	2.66667	7
Vallferrera	JUL93	C10	2768.36	228.096	5.9	17.1154	0.77724	0.846909	19.7143	36.5714	47.4286	4.42857	3.14286	2.42857	6
Vallferrera	JUL93	C11	4231.66	319.729	5.24	15.6061	0.911352	1.01498	32.4	51.8	34	3.6	2.2	1.8	6.6
Vallferrera	JUL93	C12	5866.43	547.383	5.54	16.6176	0.86868	0.88392	28.4	51.2	31.4	5.8	3.2	3.8	5.4
Vallferrera	JUL93	A1	6709.96	539.717	6.58333	14.5833	0.80391	0.9017	19.6667	35.9167	37.5	11.5	5.58333	1.75	8.25
Vallferrera	JUL93	A2	5626.51	513.716	8.3	11.4151	0.863138	0.971204	39	53.6364	21.4545	10.1818	4.45455	2.09091	8.18182
Vallferrera	JUL93	A3	9491.15	896.388	8.21818	17.217	0.626225	0.717665	28.0909	37.9091	34.5455	10.3636	4.54545	2.63636	10
Vallferrera	JUL93	A4	8979.59	1056.83	5.34545	20.274	0.799407	0.935182	33.6364	64.1818	14	9.45455	6.09091	1.45455	4.90909
Vallferrera	JUL93	A5	7021.61	701.795	6.30909	15.2907	0.737062	0.811876	26.6364	49.6364	21.9091	9.72727	5.36364	3.54545	8
Vallferrera	NOV93	B3	2821.33	240.849	6.30909	16.7442	0.610985	0.676102	21.3636	47.9091	24.7273	9.27273	7.18182	2.81818	7.72727
Vallferrera	NOV93	B2	3000	262.206	7.5	15.9184	0.480753	0.586047	22.5455	43.9091	23	12.8182	10.0909	2.09091	7.27273
Vallferrera	NOV93	B1	1952.66	151.689	6.14545	19.6429	0.54864	0.569422	24.7273	45.4545	21.7273	13.8182	6.36364	2.45455	10.0909
Vallferrera	NOV93	C1	3862.8	303.514	6.31667	17.9787	0.58928	0.63754	24.5	46	29.6667	9.33333	2.66667	2	10.3333
Vallferrera	NOV93	C2	3076.92	270.075	8.45	15.2542	0.46482	0.51054	18.5	37.1667	31.1667	11.6667	4.83333	2.5	12.6667
Vallferrera	NOV93	C3	3900	345.964	8	15.614	0.42164	0.44704	24.5	44.8333	24.5	13.5	4	2.5	10.3333
Vallferrera	NOV93	C4	3392.67	316.886	6.36667	18.5106	0.54102	0.57658	32.1667	50	27.6667	9.83333	2.5	1.5	8.66667
Vallferrera	NOV93	C5	2970.3	258.572	6.73333	18.0851	0.508	0.53848	23.6667	42.3333	30.5	10.1667	3.66667	2.83333	10.5
Vallferrera	NOV93	C6	3630.25	393.128	5.95	19.8864	0.5588	0.6223	29.6667	49	26.5	9.33333	3.66667	2.5	9
Vallferrera	NOV93	C7	3382.11	293.019	6.15	17.6667	0.65532	0.73914	20.6667	38.3333	29.5	12.6667	5.83333	2.66667	11
Vallferrera	NOV93	C8	4313.04	344.737	5.75	16.9767	0.7112	0.75438	27.3333	48.5	30.5	8.16667	2.33333	1.33333	9
Vallferrera	NOV93	C9	3069.18	268.555	7.95	15.625	0.73152	0.70612	24.3333	43.5	33.8333	8.5	3.16667	2.16667	8.83333
Vallferrera	NOV93	C10	3299.19	301.863	6.18333	20.1087	0.6223	0.6477	21	40.8333	33.6667	10.6667	4.33333	1.66667	8.83333
Vallferrera	NOV93	C11	4090.03	248.69	5.18333	18.375	0.66548	0.63754	17.6667	39.3333	33.6667	13.6667	2.66667	1.5	9.16667
Vallferrera	NOV93	C12	2468.57	191.009	5.83333	17.8409	0.77724	0.7874	24.6667	47.3333	25.5	12	3	4.16667	8.83333
Vallferrera	NOV93	A1	4405.34	383.912	6.975	17.4519	0.56642	0.55245	25.6667	47.9167	22.25	12.3333	5.66667	1.91667	10.0833
Vallferrera	NOV93	A2	4888.89	447.787	9	16.2174	0.652549	0.673331	26.1818	46.3636	24.2727	12.7273	5.09091	2.27273	9.27273
Vallferrera	NOV93	A3	7228.92	787.636	8.3	19.3578	0.540327	0.559724	28	50.8182	20.6364	11.4545	4.27273	1.63636	10.5455
Vallferrera	NOV93	A4	5040.94	637.3	5.77273	27.8608	0.610985	0.627611	36.6364	58.8182	17.3636	9.18182	4.36364	1.81818	8.72727
Vallferrera	NOV93	A5	4182.56	561.555	8.28	13.6224	0.429768	0.454152	33	54.3	18.8	8.2	4	2.8	12.3
Vallferrera	JUL94	B3	3698.14	302.405	6.35455	15.4651	0.599902	0.628996	30.4545	64.0909	21.8182	8.27273	3.27273	1.27273	1.27273
Vallferrera	JUL94	B2	5563.25	467.891	7.10833	14.0686	0.45974	0.50673	28.8333	62.1667	25.0833	7.33333	2.25	1.41667	1.75
Vallferrera	JUL94	B1	4502.41	375.186	5.66364	18.0128	0.550025	0.599902	28.7273	57.3636	32.0909	6.18182	1.45455	0.818182	2.09091
Vallferrera	JUL94	C1	3022.22	308.272	6.75	17.551	0.73406	0.7747	28.8333	57.1667	28.3333	6.16667	2.5	2.83333	3
Vallferrera	JUL94	C2	2414.78	139.882	8.11667	14.9107	0.61976	0.6477	15.3333	48.8333	41	4	0.833333	3	2.33333
Vallferrera	JUL94	C3	2553.19	238.654	7.83333	17.9464	0.5842	0.59944	22.1667	61.3333	28.1667	6.16667	1.5	1	1.83333
Vallferrera	JUL94	C4	3023.14	294.206	6.48333	21.6667	0.52832	0.56388	24.5	60.5	30.1667	5.66667	1.16667	0.833333	1.66667
Vallferrera	JUL94	C5	2647.48	186.962	6.95	18.3333	0.50292	0.53086	12	45.8333	45.3333	5.33333	0.833333	1	1.66667
Vallferrera	JUL94	C6	2519.34	247.152	6.03333	21.2222	0.48006	0.5207	26.3333	68.8333	22	5.33333	1	0.833333	2
Vallferrera	JUL94	C7	2739.13	237.77	6.13333	21.5217	0.44958	0.49276	21	64.6667	26	5.66667	1.5	0.833333	1.33333
Vallferrera	JUL94	C8	2500	226.683	6	17.4528	0.70104	0.74676	30	72	21.8571	2.71429	0.714286	0.571429	2.14286
Vallferrera	JUL94	C9	2410.48	248.649	7.63333	17.2222	0.7366	0.77978	21.5	61	30.8333	3.83333	0.833333	0.333333	3.16667
Vallferrera	JUL94	C10	3717.39	268.499	6.13333	17.2826	0.54864	0.58674	20.8333	70	21.5	3.83333	1	0.5	3.16667
Vallferrera	JUL94	C11	3120.74	298.324	5.38333	16.9048	0.68834	0.72136	20.3333	76.5	18.1667	2.33333	0.166667	0	2.83333
Vallferrera	JUL94	C12	3281.5	272.151	6.21667	16.6667	0.5969	0.64008	25.6667	77.6667	15	2.66667	0.833333	0.833333	3
Vallferrera	JUL94	A1	4911.56	373.56	7.36667	19.2453	0.74295	0.80391	24.6667	57.5833	30.9167	5.83333	2.33333	0.75	2.58333
Vallferrera	JUL94	A2	6102.43	571.339	8.96364	18.5965	0.818804	0.882535	24.1818	56.9091	29.5455	7.63636	2.27273	0.636364	3
Vallferrera	JUL94	A3	7561	809.777	8.34545	18.1776	0.615142	0.671945	23.8182	59.6364	27.9091	6.45455	1.72727	0.818182	3.45455
Vallferrera	JUL94	A4	5091.88	614.022	6.26667	21.1957	0.73025	0.79121	38.0833	73.0833	16.5833	4	0.916667	0.75	4.66667
Vallferrera	JUL94	A5	4639.02	520.851	7.78182	18.0097	0.586047	0.631767	25	63	23.6364	4.36364	1.63636	2.54545	4.81818
Vallferrera	NOV94	B3	1870.28	184.142	7.21818	15.4688	0.491836	0.551411	16.2727	49.6364	33.6364	7	3.27273	1.27273	2.36364
Vallferrera	NOV94	B2	2840.24	228.579	7.04167	16.2019	0.54737	0.6096	21	59.4167	26	7.91667	3.33333	1.25	2.08333
Vallferrera	NOV94	B1	3113.53	293.437	5.84545	20.6173	0.608215	0.674716	24.0909	55.9091	25.6364	10.2727	4.72727	1.36364	2.09091
Vallferrera	NOV94	C1	5046.45	641.001	6.81667	18.7755	0.762	0.82804	24.3333	62.5	25.5	7	2.16667	1	1.83333
Vallferrera	NOV94	C2	4914.51	354.399	8.38333	13.6441	0.67564	0.73152	19.8333	45.6667	34.6667	12	4	1.16667	2.5
Vallferrera	NOV94	C3	4911.2	513.108	8.63333	17.2951	0.508	0.55626	11.5	36.6667	43.1667	11.5	4.66667	1.33333	2.66667
Vallferrera	NOV94	C4	2901.1	304.101	6.06667	23.6364	0.61214	0.67818	20.1667	59.6667	27	6.66667	3.66667	1.16667	1.83333
Vallferrera	NOV94	C5	1725.84	128.916	7.41667	17.4528	0.61468	0.6985	22.8333	57	31.5	6.66667	1.83333	1.16667	1.83333
Vallferrera	NOV94	C6	1609.33	150.411	5.71667	21.2791	0.60706	0.65278	32.3333	58.6667	28.6667	5.5	3.5	1.33333	2.33333
Vallferrera	NOV94	C7	2357.14	259.233	5.6	21.2195	0.57658	0.57404	26.5	60.1667	24.3333	8	3	1.33333	3.16667
Vallferrera	NOV94	C8	3072	290.353	6.25	17.2826	0.95758	1.01346	20.3333	59.1667	30.8333	4.16667	2	1.33333	2.5
Vallferrera	NOV94	C9	2820	235.108	6.66667	21.1458	0.68326	0.73152	14.3333	55.5	29.1667	7.16667	3.33333	1.33333	3.5
Vallferrera	NOV94	C10	2466.67	170.558	6	19.7778	0.6096	0.67818	19.1667	47.5	37.5	7	3.16667	1.33333	3.5
Vallferrera	NOV94	C11	3863.78	386.375	5.38333	19.6341	0.61468	0.70104	21.8333	61.3333	27.5	4	0.833333	0.5	5.83333
Vallferrera	NOV94	C12	3072	316.068	6.25	20.1087	0.67056	0.70866	14.5	55.8333	36.1667	3.16667	1.16667	0.5	3.16667
Vallferrera	NOV94	A1	3202.86	338.081	7.61818	17.449	0.634538	0.724593	22.2727	57.4545	29.2727	7.09091	2.27273	1.09091	2.81818
Vallferrera	NOV94	A2	6202.45	733.257	6.69091	16.6667	0.626225	0.749531	19.4545	60.1818	27.5455	5.90909	1.90909	0.909091	3.54545
Vallferrera	NOV94	A3	4328.87	593.341	8.15455	16.5534	0.652549	0.702425	19	51.3636	26.1818	12.1818	5.81818	1.27273	3.18182
Vallferrera	NOV94	A4	4504.93	645.204	5.52727	21.039	0.831273	0.888076	23.4545	63.0909	24.1818	6.63636	2.27273	0.818182	3
Vallferrera	NOV94	A5	3893.11	569.906	7.65455	15.35	0.408709	0.475211	21.9091	64.3636	18.4545	7	2.90909	2.54545	4.72727
Pallaresa	OCT92	D1	1875.9	60.6842	4.95	15.0893	0.5785	0.622225	14.55	39.2	22.15	18	12.05	3.8	5.8
Pallaresa	OCT92	D2	1400.34	37.1345	4.435	11.2745	0.52625	0.58725	9.65	41.75	28.05	12.1	9.6	3.55	4.95
Pallaresa	OCT92	D3	1792.29	51.2913	4.27	13.3838	0.493	0.50875	18.75	42.85	29.9	9.95	10.15	2.95	4.2
Pallaresa	OCT92	D4	1732.98	54.0222	4.35	16.6176	0.738571	0.8375	11.0714	49.1429	24.3571	14.4286	8.28571	1.42857	3.64286
Pallaresa	OCT92	D5	2213.78	63.0229	4.85	15.9091	0.61725	0.76625	12.5	44	29.45	12.85	8.6	2	2.7
Pallaresa	OCT92	D6	1950.02	68.1899	5.24211	15.5856	0.641053	0.778684	16.2105	35.4211	35	14.9474	10.3684	2.42105	1.89474
Pallaresa	OCT92	H1	2167.22	78.239	4.98333	20.303	0.83	0.971667	19.8333	38.6667	27.5	16.3333	11	3.66667	2.83333
Pallaresa	OCT92	H2	2351.35	103.333	4.93333	15	0.7775	0.795	12.1667	24.3333	39.1667	19.8333	11.6667	2.5	2.5
Pallaresa	OCT92	H3	2331.43	130.798	5.83333	17.1795	0.725833	0.83	15.1667	30.5	31.1667	19.3333	15	2.83333	3.5
Pallaresa	OCT92	H4	1750	91.3388	4.8	18.0303	0.806667	0.87	18.3333	47.5	22.6667	12.1667	13.5	2.66667	2.83333
Pallaresa	OCT92	H5	1382.2	37.2252	6.36667	10.3659	0.866667	0.951667	15.1667	32.3333	44.6667	11.5	6	3.16667	2.33333
Pallaresa	OCT92	H6	1954.2	89.1965	6.55	13.0233	0.761667	0.821667	8.33333	25.3333	37.1667	21.3333	14.1667	2.83333	2.5
Pallaresa	OCT92	H7	2666.67	101.406	5.55	13.5135	0.865833	0.929167	9	32.8333	32.1667	15.8333	14.3333	2.66667	2.16667
Pallaresa	OCT92	H8	1759.53	66.0245	5.68333	12.7632	0.721667	0.769167	5.66667	18.5	43.3333	22.6667	12.8333	1.66667	2.66667
Pallaresa	OCT92	H9	2335.14	59.1435	6.16667	14.5122	0.720833	0.703333	12	40.6667	26.5	18.3333	10.3333	1.66667	2.5
Pallaresa	OCT92	H10	2863.16	105.103	4.75	16.0606	0.683333	0.731667	14.3333	46	31.6667	9.16667	7	2	3.5
Pallaresa	OCT92	H11	1333.33	35.447	4.8	19.1935	0.555	0.605833	12.6667	35.8333	30	16.8333	12.1667	2.16667	3
Pallaresa	OCT92	H12	1853.28	95.5302	4.31667	19.3103	0.581667	0.679167	19.5	34.5	37	14	9.16667	2.16667	3.16667
Pallaresa	OCT92	U1	2724.18	107.113	4.405	16.3131	0.63575	0.72825	12.7	32.4	38.35	16.1	9.05	1.45	2.85
Pallaresa	OCT92	U2	1909.09	105.963	3.82381	18.2796	0.738095	0.880952	12.2381	63.2381	17.2857	7.2381	4.71429	2.28571	6.38095
Pallaresa	OCT92	U3	2838.03	130.851	4.525	14.717	0.63325	0.694	6.2	23.65	47.1	17.15	8.7	2.05	2.35
Pallaresa	OCT92	U4	3236.38	143.14	4.10952	15.3265	0.631429	0.747381	9.19048	22.5238	37.381	22.0476	14.4762	1.80952	1.7619
Pallaresa	OCT92	U5	2615.61	156.326	4.375	15.6289	0.554	0.63075	5.25	11.75	52.1	19.55	12.75	2.45	1.95
Pallaresa	OCT92	U6	2622.15	136.148	4.38571	15.7317	0.755469	0.849086	1.04762	13.8095	44.3333	24.5714	10.4286	3.09524	3.7619
Pallaresa	OCT92	U7	3200	139.611	4	17.1304	0.747486	0.844731	0	1.61905	61.619	21.1905	9.61905	2.04762	3.90476
Pallaresa	OCT92	U8	6016.93	370.703	3.21316	21.4943	0.759594	0.849429	0	5.36842	51.6316	18.2632	14.3158	4.47368	5.94737
Pallaresa	OCT92	U9	2651.79	182.13	3.73333	35.9259	0.312057	0.343989	0	0	2.85714	15.1429	62.1429	11.7619	8.09524
Pallaresa	OCT92	U10	1710.53	110.003	4	24.1981	0.343662	0.39624	0	0	3.25	38.3	43.25	7.8	4.1
Pallaresa	OCT92	U11	3980.86	233.693	2.6125	30	0.36576	0.405765	0	0	2.1875	51.9375	36.1875	6.25	3.4375
Pallaresa	OCT92	U12	3382.59	250.595	2.9	21.3158	0.46482	0.506384	0.318182	7.31818	14.1364	49.4091	19.9091	5.22727	4
Pallaresa	OCT92	U13	2942.03	249.128	1.97143	28.3571	0.465714	0.514048	0.52381	2.57143	13.6667	52.5714	20.4286	5.71429	5.04762
Pallaresa	OCT92	U14	3819.74	227.412	1.69545	16.194	0.515455	0.541136	0.363636	3.45455	29.2727	25.3636	14.1818	5.72727	22
Pallaresa	OCT92	U15	2352.94	137.832	0.85	16.8627	0.633182	0.721364	1.95455	7.40909	37.5909	30.8182	13.4091	2.63636	8.13636
Pallaresa	MAIG93	D1	602.296	15.9454	6.325	26.4835	1.26208	1.26208	10.9167	33.3333	25.6667	14	12.8333	7.16667	7
Pallaresa	MAIG93	D2	735.14	17.6198	5.29	23.1746	1.0125	1.0125	29	65.5	15.8	6.7	5.8	2.2	4
Pallaresa	MAIG93	D3	918.167	32.3897	5.55455	24.2763	0.983636	0.983636	23.3636	46.9091	22.8182	9.72727	9.09091	5.45455	6
Pallaresa	MAIG93	D4	923.867	25.7266	4.175	26.8182	1.09625	1.09625	6.5	51.75	13.875	13.5	9.625	2.125	9.125
Pallaresa	MAIG93	D5	1457.16	57.349	4.84	24.7619	1.0375	1.0375	22.9	52.4	11.3	17.7	7.8	4.1	6.7
Pallaresa	MAIG93	D6	1551.01	68.7473	5.68889	23.0952	0.999444	0.999444	17.6667	33.2222	21.4444	20.4444	11.2222	6.11111	7.55556
Pallaresa	MAIG93	H1	2133.33	91.516	5.25	22.375	1.1625	1.1625	18.3333	53	16.6667	13.6667	8.66667	3.33333	4.66667
Pallaresa	MAIG93	H2	1003.22	47.4392	5.18333	25.5	1.10167	1.10167	14.8333	30.8333	37.6667	13.8333	11.6667	2.5	3.5
Pallaresa	MAIG93	H3	925.054	42.4074	7.78333	19.1964	0.908333	0.908333	20.3333	42.3333	25.5	12.3333	11.8333	4.33333	3.66667
Pallaresa	MAIG93	H4	1444.82	77.4193	4.98333	27.5	0.995	0.995	18.1667	41.6667	32.8333	9.5	9	3.83333	3.16667
Pallaresa	MAIG93	H5	891.247	37.5701	6.28333	19.2391	0.951667	0.951667	14.6667	42.1667	40.6667	6.66667	5.16667	2.33333	3
Pallaresa	MAIG93	H6	1804.51	86.8279	6.65	22.8125	0.758333	0.758333	12.6667	39.5	34.1667	12.5	8	3	2.83333
Pallaresa	MAIG93	H7	1604.28	83.9495	6.23333	23.2955	0.898333	0.898333	14	42.1667	29.1667	12.3333	10.1667	4	2.16667
Pallaresa	MAIG93	H8	984.615	38.442	6.5	17.9787	0.905833	0.905833	14.8333	27.1667	46.6667	11.3333	8.66667	4	2.16667
Pallaresa	MAIG93	H9	1881.24	67.4484	7.01667	20.1961	0.809167	0.809167	12.6667	34.6667	34.8333	15.5	9.83333	3.16667	2
Pallaresa	MAIG93	H10	1328.72	65.2062	4.81667	28.8158	0.8	0.8	10	40.6667	28.6667	6.66667	4.66667	1.16667	1.5
Pallaresa	MAIG93	H11	2642.2	124.516	5.45	30.9756	0.775833	0.775833	10.8333	31.8333	31.6667	14.3333	14.6667	5.16667	2.33333
Pallaresa	MAIG93	H12	2211.6	121.058	4.88333	29.8649	0.7575	0.7575	20.6667	42	31.5	9.83333	11	3.33333	2.33333
Pallaresa	MAIG93	U1	1753.23	88.7758	5.07	38.3077	1.1645	1.1645	12.7	29.4	32.4	17.6	16.2	2	2.4
Pallaresa	MAIG93	U2	713.282	39.7034	4.87	33.5246	1.537	1.537	7.5	37.4	29	5.6	4.8	1.4	1.8
Pallaresa	MAIG93	U3	1206.86	85.3659	5.68182	31.039	1.14227	1.14227	9.72727	27	44	14.9091	9.54545	2.09091	2.45455
Pallaresa	MAIG93	U4	1668.43	92.1701	5.15455	32.4658	1.03727	1.03727	22.4545	30.1818	46.7273	11.4545	7.90909	1.45455	2.27273
Pallaresa	MAIG93	U5	1181.98	102.708	5.24545	30.9722	0.890909	0.890909	10.3636	23.2727	54.3636	9.45455	7.63636	2.81818	2.45455
Pallaresa	MAIG93	U6	2144.65	142.136	4.87	25	0.787	0.787	3.2	6.5	50.4	25.2	11.4	2.5	4
Pallaresa	MAIG93	U7	1939.96	109.614	4.84545	24.5588	0.862727	0.862727	0.545455	1.18182	70.0909	13.6364	9.18182	3.18182	2.72727
Pallaresa	MAIG93	U8	4895.29	290.835	3.47273	27.5893	0.792727	0.792727	2	2	55.4545	16.1818	15	4.45455	6.90909
Pallaresa	MAIG93	U9	6220.59	644.075	2.66667	33.7838	0.161875	0.161875	1.22222	1.22222	9.22222	15.3333	55.4444	14.6667	4.11111
Pallaresa	MAIG93	U10	2865.15	186.94	3.38	18.2292	0.3385	0.3385	0	0	4.7	55.1	27.8	9.5	2.9
Pallaresa	MAIG93	U11	3333.33	263.621	2.6	27.1429	0.278571	0.278571	0	0	1.71429	33.2857	54	7	4
Pallaresa	MAIG93	U12	2393.77	156.336	2.71538	18.3929	0.3668	0.3668	9.69231	12.5385	10.6923	31.7692	31.0769	7.92308	6
Pallaresa	MAIG93	U13	2337.5	222.292	2.18182	20.6579	0.367368	0.367368	1	1.72727	8.54545	47.7273	30.1818	6.27273	5.54545
Pallaresa	MAIG93	U14	3033.54	173.236	1.55833	10.6757	0.175	0.175	4.41667	9.33333	41.1667	20.0833	9.58333	7.33333	12.5
Pallaresa	MAIG93	U15	2933.33	163.719	0.818182	10	0.262727	0.262727	7.27273	9.18182	30.0909	35.8182	12.2727	5.18182	7.45455
Pallaresa	NOV93	D1	1184.77	38.7562	3.5	20.3977	0.67691	0.69215	29.25	50	25.5833	9.41667	9	2.5	3.5
Pallaresa	NOV93	D2	983.469	42.9152	2.2	20.2941	0.519684	0.61722	23.2	49.2	33.9	7.4	5.9	1.4	2.2
Pallaresa	NOV93	D3	915.009	48.5721	2.27273	21.9118	0.717665	0.785553	15.9091	32.5455	49	9.18182	5.27273	1.72727	2.27273
Pallaresa	NOV93	D4	1542.17	51.5491	2.875	17.1591	0.50673	0.51054	20.25	50.125	30.125	8.375	6.625	1.875	2.875
Pallaresa	NOV93	D5	1675.78	80.1991	3.54545	18.8971	0.525087	0.550025	11.7273	36	31.6364	15.7273	11.1818	1.90909	3.54545
Pallaresa	NOV93	D6	2024.56	86.737	2.44444	16.2712	0.46736	0.524933	22.4444	43.3333	29.2222	14.5556	9	1.44444	2.44444
Pallaresa	NOV93	H1	1310.34	55.5602	1.16667	25.5952	0.30861	0.38862	24.1667	42.3333	41.5	8.16667	5.5	1.33333	1.16667
Pallaresa	NOV93	H2	959.373	48.5015	1.14286	28.75	0.522514	0.683623	18.1429	36.1429	51	6	4.57143	1.14286	1.14286
Pallaresa	NOV93	H3	1003.34	46.4595	1	25.3947	0.664464	0.707136	23.6	45.8	42	5.8	3.8	1.6	1
Pallaresa	NOV93	H4	2638.3	126.66	1.33333	25.1429	0.56896	0.64008	20.1667	33.8333	41.8333	11.5	9.83333	1.66667	1.33333
Pallaresa	NOV93	H5	1062.73	54.213	1.33333	19.7222	0.49276	0.64008	15.3333	29.6667	51.5	9	7.5	1	1.33333
Pallaresa	NOV93	H6	3901.84	182.49	1.33333	20	0.5588	0.62484	15.8333	32.5	52	7.5	4.83333	1.83333	1.33333
Pallaresa	NOV93	H7	2509.8	105.962	1	23.8889	0.54864	0.61976	15.3333	37	47.1667	7.83333	5.5	1.5	1
Pallaresa	NOV93	H8	1113.4	45.1489	1	20.3333	0.51308	0.56896	10.1667	23	59.8333	8.5	6.33333	1.33333	1
Pallaresa	NOV93	H9	2354.07	97.0418	1.5	23.7	0.49784	0.6858	24.5	46.5	33	12.1667	5.66667	1.16667	1.5
Pallaresa	NOV93	H10	1382.72	51.4578	1.83333	26.1429	0.50292	0.61976	28	52.5	35.3333	5.66667	3.33333	1.33333	1.83333
Pallaresa	NOV93	H11	2762.59	187.985	1.5	29.1667	0.35052	0.508	17.1667	38.8333	44.5	8.5	5	1.66667	1.5
Pallaresa	NOV93	H12	1472.92	108.074	1.66667	28.1944	0.69088	0.67056	21.3333	51	35.6667	6.16667	4	1.5	1.66667
Pallaresa	NOV93	U1	899.664	44.9841	1.4	30.7759	0.521208	0.618744	15.4	31.3	44	12.7	9	1.6	1.4
Pallaresa	NOV93	U2	929.224	59.1213	2.09091	25.25	0.687185	0.725978	11.0909	37.9091	42.4545	9.27273	7.18182	1.09091	2.09091
Pallaresa	NOV93	U3	1387.76	86.5091	1.36364	26.1972	0.482138	0.576349	8.54545	19.3636	61.4545	10.8182	5.36364	1.63636	1.36364
Pallaresa	NOV93	U4	2353.91	135.9	1.27273	24.8462	0.556953	0.606829	8.45455	20.8182	54.2727	14.5455	7.36364	1.72727	1.27273
Pallaresa	NOV93	U5	1847.31	138.627	1.72727	13.6667	0.667789	0.709353	7.81818	20.7273	62.7273	7.36364	5.18182	2.27273	1.72727
Pallaresa	NOV93	U6	1135.76	74.056	3.72727	25.9848	0.178724	0.163484	3.27273	14.1818	40.2727	23.5455	14.8182	3.45455	3.72727
Pallaresa	NOV93	U7	2081.19	163.223	6.75	13.9231	0.27686	0.34544	0.75	6.41667	48.3333	19.5833	13.9167	5	6.75
Pallaresa	NOV93	U8	3626.81	279.856	7.63636	14.3182	0.390698	0.450273	0	9.72727	42.9091	19.2727	11.7273	8.72727	7.63636
Pallaresa	NOV93	U9	2481.71	182.827	15.7273	27.1875	0.131618	0.160713	0	0.272727	10	17.1818	33.0909	23.7273	15.7273
Pallaresa	NOV93	U10	1711.11	161.582	10.9091	18.9	0.199505	0.250767	0	0	4.72727	34.7273	25.3636	21.3636	10.9091
Pallaresa	NOV93	U11	2669.25	207.667	9.25	23.2955	0.15748	0.18288	0	1.5	10.5	26.75	31.9167	20.0833	9.25
Pallaresa	NOV93	U12	3038.17	205.792	5.78571	18.2727	0.246017	0.276497	5.71429	11.3571	16.1429	28.2143	24.6429	13.8571	5.78571
Pallaresa	NOV93	U13	2838.71	296.171	11.7273	18.5	0.285404	0.326967	1.90909	4.81818	26.0909	21.3636	22.1818	11.6364	11.7273
Pallaresa	NOV93	U14	4363.64	185.047	13.8333	14.2857	0.1397	0.17018	1.5	7.5	35.5833	17.3333	13.5	12.25	13.8333
Pallaresa	JUL94	D1	634.463	20.9581	6.04545	15.2976	0.313113	0.346364	15.1818	41.9091	28.2727	10.9091	8.18182	3.90909	6.81818
Pallaresa	JUL94	D2	913.242	25.5655	5.1	14.1549	0.532015	0.587433	12	51.6364	24.3636	8.45455	6.18182	2.36364	3.27273
Pallaresa	JUL94	D3	1744.46	62.0279	4.55455	13.5385	0.559724	0.601287	11	50	33.9091	7.18182	3.81818	1.81818	3.27273
Pallaresa	JUL94	D4	1477.81	44.0881	4.2375	17.0909	0.428625	0.49911	9.625	60	25	5	3.375	2.125	4.5
Pallaresa	JUL94	D5	1478.54	60.0838	4.35455	14.7656	0.439189	0.520931	15.3636	59	26.1818	4.54545	3.90909	2.54545	3.81818
Pallaresa	JUL94	D6	1409.32	79.429	4.86	16.4062	0.437388	0.489204	9.5	43.8	38.6	7.4	4.8	2.4	3
Pallaresa	JUL94	H1	1224.49	52.6635	4.9	15.3947	0.3937	0.43434	14	52.1667	29.3333	6.33333	5	2.33333	4.83333
Pallaresa	JUL94	H2	1337.7	90.2859	5.08333	11.5385	0.53848	0.58928	10.3333	35.1667	47.1667	7.16667	5.83333	2	2.66667
Pallaresa	JUL94	H3	1062.09	51.3812	6.12	10.2632	0.435864	0.530352	13.4	47.2	34.6	7.2	3.8	3.4	3.8
Pallaresa	JUL94	H4	1338.29	73.5237	4.48333	15.8333	0.41656	0.49022	10	42.8333	41	6.66667	4	3	2.5
Pallaresa	JUL94	H5	1551.33	92.1152	4.38333	10.8333	0.38862	0.43688	7.5	27.5	57	6.5	3.66667	2.5	2.83333
Pallaresa	JUL94	H6	1353.12	78.7591	5.61667	12.2619	0.37084	0.44958	8	38	45	7.33333	4.83333	2.33333	2.5
Pallaresa	JUL94	H7	1500	82.3978	5.86667	11.4773	0.42164	0.48006	7.66667	44.6667	39.1667	7.66667	4.33333	2	2.16667
Pallaresa	JUL94	H8	1063.71	42.9556	6.01667	9.33333	0.37846	0.47498	6.5	26.8333	58.5	7	3.66667	2.16667	1.83333
Pallaresa	JUL94	H9	1559.32	61.4249	5.9	15.9302	0.39116	0.46228	13.1667	26.6667	55.5	7.83333	4	3.16667	2.83333
Pallaresa	JUL94	H10	1784.39	120.007	4.48333	18.3784	0.34544	0.39878	15.1667	51	35.3333	5.33333	2.66667	3	2.66667
Pallaresa	JUL94	H11	648.649	24.7812	4.93333	19.1026	0.2032	0.23876	10	62.6667	22.1667	4.83333	2.16667	3.66667	4.5
Pallaresa	JUL94	H12	939.13	49.2785	3.83333	12.5806	0.23114	0.28956	10	63.5	26.5	3.5	1.83333	2.16667	2.5
Pallaresa	JUL94	U1	2200	116.215	4.36364	15.7937	0.371302	0.425335	6.36364	46.2727	34.3636	8.81818	5.09091	2.09091	3.36364
Pallaresa	JUL94	U2	1788.18	100.565	3.69091	14.375	0.432262	0.480753	9.54545	76.5455	10.9091	3.54545	3.81818	1.27273	3.90909
Pallaresa	JUL94	U3	1568.63	95.0395	4.25	12.8947	0.36576	0.39624	21.2	50.8	36.4	5.5	3	1.7	2.6
Pallaresa	JUL94	U4	1663.07	127.066	4.20909	11.9355	0.414251	0.451658	9.54545	41.6364	42.7273	7.27273	3.72727	2	2.63636
Pallaresa	JUL94	U5	1643.43	122.311	4.56364	13.6154	0.270164	0.3048	3	23.5455	59.0909	8.45455	4.27273	2	2.63636
Pallaresa	JUL94	U6	1766.6	45.9369	4.24545	23.4127	0.781396	0.814647	4.18182	13	55.6364	14	8.36364	4.36364	4.63636
Pallaresa	JUL94	U7	1042.11	77.5687	4.31818	20.1538	0.666404	0.710738	2.27273	6.63636	66.4545	12.0909	7	4.45455	3.36364
Pallaresa	JUL94	U8	2194.36	157.74	3.19	23.8043	0.749808	0.794004	2.4	5.6	55.3	14.3	12.4	7	5.4
Pallaresa	JUL94	U9	1930.78	174.759	3.05	34	0.196596	0.210312	0	0.3	14.6	23.9	22.6	26.7	11.9
Pallaresa	JUL94	U10	1102.69	94.2346	3.71818	21.7273	0.258354	0.278674	0	0	12.7273	35	25.7273	20	6.54545
Pallaresa	JUL94	U11	1270.76	116.612	2.51818	27.6136	0.272716	0.287154	0	0	30.6364	33.7273	17.4545	12.6364	5.54545
Pallaresa	JUL94	U12	1900.33	142.331	2.73636	19.1111	0.33147	0.360045	0.727273	4.45455	54.9091	15.4545	10.3636	8.54545	6.27273
Pallaresa	JUL94	U13	3101.06	208.7	1.70909	25.5882	0.351905	0.385156	0	10.2727	43.6364	17	19.8182	5.09091	4.18182
Pallaresa	JUL94	U14	1868.92	50.3928	1.675	10.2564	0.21082	0.2413	2.66667	11.9167	45.25	15.25	8.91667	7.08333	11.5833
Pallaresa	JUL94	U15	3807.69	281.158	0.709091	10.625	0.315884	0.357447	17.1818	41.5455	21.2727	14.0909	14.5455	3	5.54545
Pallaresa	NOV94	D1	803.994	33.447	5.76667	19.7093	0.56515	0.62103	19	46.25	37.0833	9.5	3.16667	1.41667	2.58333
Pallaresa	NOV94	D2	709.677	23.9753	5.63636	21.859	0.785553	0.840971	22	61.7909	24.8182	6.63636	2.81818	1.54545	2.27273
Pallaresa	NOV94	D3	1372.65	54.9859	5.31818	22.5676	0.856211	0.922713	7.90909	45.3636	39.0909	8.36364	3.54545	1.81818	1.81818
Pallaresa	NOV94	D4	874.482	35.4329	4.7375	26.3265	0.98679	1.07442	14.625	70.125	21.25	3.75	1.375	1	2.5
Pallaresa	NOV94	D5	921.466	37.1359	5.20909	28.0541	0.906087	0.955964	6.81818	59.8182	29.3636	5.54545	1.81818	1	2.45455
Pallaresa	NOV94	D6	907.598	44.3975	5.92222	24.5455	0.846667	0.89408	14.7778	51.0333	35.9667	6.33333	2.11111	1.66667	2.88889
Pallaresa	NOV94	H1	1131.31	61.0424	4.95	21.6667	0.70358	0.762	17.6667	64.8333	21	6.66667	3.5	1.66667	2.33333
Pallaresa	NOV94	H2	1283.02	74.6264	5.3	19.1463	0.73406	0.8128	5	32.8333	52.8333	7.16667	3	2.16667	2
Pallaresa	NOV94	H3	838.71	27.2142	6.2	15.9783	0.69596	0.762	14.6667	45.8333	37.6667	9.16667	2.66667	1.66667	3
Pallaresa	NOV94	H4	1263.16	120.447	4.75	22.1429	0.5715	0.59944	20	46	36.5	9.33333	4.16667	2	2
Pallaresa	NOV94	H5	1062.5	14.6242	6.4	14.5745	0.66294	0.74676	9.33333	47.5	38	6.5	4.16667	1.66667	2.16667
Pallaresa	NOV94	H6	1239.13	54.7834	6.13333	19.4318	0.51054	0.5842	12.3333	29.3333	50.6667	10.1667	5.83333	2.16667	1.83333
Pallaresa	NOV94	H7	1669.38	40.6562	5.27143	17.5	0.542109	0.631371	13	50.1429	36.2857	7.14286	3.42857	1	2
Pallaresa	NOV94	H8	1038.96	44.1157	6.16	15.2632	0.743712	0.786384	9	52.8	21.6	8.4	3.2	1.8	1.6
Pallaresa	NOV94	H9	1537.6	49.8439	5.98333	15.7778	0.5207	0.58166	17.5	46.6667	37.5	8.16667	4.66667	1.33333	1.66667
Pallaresa	NOV94	H10	1860.47	14.7873	4.3	24.1176	0.78232	0.8636	19.3333	47.6667	39.6667	6.33333	3.16667	1	2.16667
Pallaresa	NOV94	H11	644.295	58.2875	4.96667	23.1579	0.42418	0.4826	5.83333	46.3333	32.1667	10.3333	6.33333	2.33333	2.5
Pallaresa	NOV94	H12	743.119	76.5124	4.84444	20.3448	0.662093	0.739987	20.6667	61	21.8889	8	5.22222	1.66667	2.22222
Pallaresa	NOV94	U1	1296.84	73.7146	4.31818	20.3968	0.509847	0.554182	11.2727	47	31.1818	11.4545	5.18182	2.09091	3.09091
Pallaresa	NOV94	U2	745.327	55.729	3.89091	16.1864	0.570807	0.608215	3	73.1818	13.5455	3.63636	2.72727	0.818182	6.09091
Pallaresa	NOV94	U3	1343.16	78.004	4.31818	16.9531	0.489065	0.555567	2.36364	36.5455	46.7273	8.09091	3.81818	1.90909	2.90909
Pallaresa	NOV94	U4	1774.19	123.523	4.22727	16.371	0.418407	0.484909	4.27273	31.9091	43.2727	13	6.81818	2.45455	2.54545
Pallaresa	NOV94	U5	1506.22	128.404	4.38182	16.5625	0.41148	0.435033	3	21.8182	57.4545	9.54545	5.36364	3.54545	2.27273
Pallaresa	NOV94	U6	1743.9	118.633	3.72727	14.322	0.351905	0.446116	8.27273	26.2727	50.0909	11.7273	5.09091	3.09091	3.72727
Pallaresa	NOV94	U7	1354.17	91.164	3.38462	14.2969	0.344658	0.405618	1.23077	6.07692	68.8462	10.9231	5.84615	4.23077	4.07692
Pallaresa	NOV94	U8	316.331	16.6873	2.81	16.3953	0.445008	0.51816	0.9	1.3	57.7	18.1	11.9	6	5
Pallaresa	NOV94	U9	3669.12	243.408	2.775	28.1633	0.19558	0.20066	0	0	11.8333	29.25	27	22.75	9.16667
Pallaresa	NOV94	U10	2089.01	160.42	3.67	20.4902	0.173736	0.219456	0	0	8.9	34.1	20.1	27.4	9.5
Pallaresa	NOV94	U11	2835.19	206.474	2.60909	23.0682	0.18288	0.221673	0	0	23.5455	38.4545	15.3636	15.5455	7.09091
Pallaresa	NOV94	U12	3922.79	265.198	2.47273	19.2857	0.218902	0.229985	0	3.09091	44.0909	22.0909	13.6364	9.54545	7.54545
Pallaresa	NOV94	U13	3004.88	354.017	1.86364	19.4054	0.271549	0.288175	0	6.27273	35.0909	20	14.7273	13.1818	10.7273
Pallaresa	NOV94	U14	3405.03	109.821	1.58333	11.25	0.14478	0.16764	2.16667	4.91667	53.9167	14.9167	10	7.33333	8.91667
Pallaresa	NOV94	U15	3521.74	213.158	0.666667	9.80769	0.14986	0.18288	5.25	24.1667	27.5833	22.8333	11.5	6.58333	7.33333
